# Supplementary material for: A facile strategy for π-extended BOPYINs: transformation into six-membered BODIPY analogues and their optical properties
Source: Royal Society of Chemistry journal article supplement (doi:10.1039/d5cc06628j), 2025-12-24
Supplement: d5cc06628j1.pdf [file d5cc06628j1.pdf]

## Supporting Information

### **A Facile Strategy for $\pi$ -Extended BOPYINs: Transformation into Six-Membered BODIPY Analogues and Their Optical Properties**

Ziyi Zhang<sup>[a]</sup>, Xi Li<sup>[a]</sup>, Yilin Feng<sup>[a]</sup>, Xin Gao,<sup>[a]</sup> Yong Qi, <sup>[a]</sup> Jiaying Yan,<sup>[ab]</sup> Nuonuo Zhang,<sup>[ab]</sup>

<sup>a</sup>College of Materials and Chemical Engineering, Key Laboratory of Inorganic Nonmetallic Crystalline and Energy Conversion Materials, China Three Gorges University, Yichang, Hubei 443002, P. R. China

<sup>b</sup>Hubei Three Gorges Laboratory, Yichang, Hubei 443007, P. R. China

\*Corresponding Email: nnzhang2015@ctgu.edu.cn and yanjiaying327@126.com

#### Content

|                                                   |    |
|---------------------------------------------------|----|
| 1. Materials and methods .....                    | 2  |
| 2. Quantum yield method.....                      | 2  |
| 3. Calculation .....                              | 2  |
| 4. General procedure .....                        | 3  |
| 5. NMR and HRMS .....                             | 8  |
| 6. UV-Vis and fluorescence data and spectra ..... | 27 |
| 7. Single Crystal.....                            | 34 |

## 1. Materials and methods

All reagents and solvents were obtained from commercial sources and used without further purification, unless otherwise noted. All chromatographic separations were carried out on silica gel (300-400 mesh).  $^1\text{H}$  NMR and  $^{13}\text{C}$  NMR spectra were recorded on Bruker 400 MHz spectrometer at 298 K. DMSO- $d_6$  was used as solvent and TMS as internal reference. The chemical shifts were reported in parts per million ( $\delta$ ) relative to the appropriate reference signal: DMSO- $d_6$  (the quintet centered at 2.50 ppm). High resolution mass spectra were measured on Bruker APCI or SYNAPT G2 analysis instrument. UV-Vis spectra in various solvents were detected on Shimadzu UV-2600 spectrometer in 10 mm quartz cell. Fluorescence spectra were obtained using a Shimadzu FL-4500 spectrometer, emission wavelengths  $\lambda$  are reported in nm.

## 2. Quantum yield method

Relative fluorescence quantum efficiencies of compounds **7** ~ **8** and **10** ~ **11** were obtained by comparing the areas under the corrected emission spectrum of the test sample in various solvents with Fluorescein ( $\Phi_f=0.9$  in 0.1 M NaOH) for **7** ~ **8** and **10** ~ **11**. Non-degassed, spectroscopic grade solvents and a 10 mm quartz cuvette were used. Dilute solutions ( $0.01 < A < 0.05$ ) were used to minimize the reabsorption effects. Quantum yields were determined using the following equation:

$$\Phi_X = \Phi_S (I_X/I_S) (A_S/A_X) (n_X/n_S)^2$$

Where  $\Phi_S$  stands for the reported quantum yield of the standard, I stands for the integrated emission spectra, A stands for the absorbance at the excitation wavelength and stands for the refractive index of the solvent being used. X subscript stands for the test sample, and S subscript stands for the standard.

## 3. Calculation

All calculations were performed with the Gaussian software package<sup>1</sup>, employing the Integral Equation Formalism Polarizable Continuum Model (IEFPCM) solvation model. Geometry optimizations were performed at the B3LYP/6-311G(d, p) level. Transition state and excited state were performed at the B3LYP/6-31G(d) level. Vibrational frequencies were done with harmonic approximation to make sure that all the geometric structures had no imaginary frequency and the transition state geometries had only one imaginary frequency. The single point energy on the energy profiles are further calculated at B3LYP/6-311G(d, p) calculation level due to its higher accuracy. TD-DFT calculation were performed at the CAM-B3LYP/6-31G(d) level.

## 4. General procedure

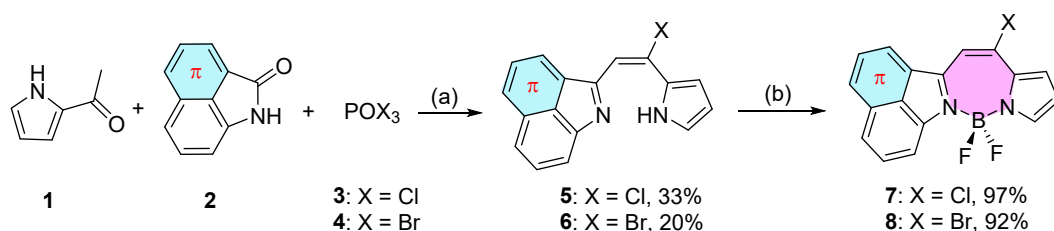

Scheme S1 Synthesis method of  $\pi$ -extended BOPYIN skeleton. (a): Toluene (Tol), reflux, 3h, (b):Et<sub>3</sub>N, BF<sub>3</sub>·Et<sub>2</sub>O, Tol, reflux, 10min.

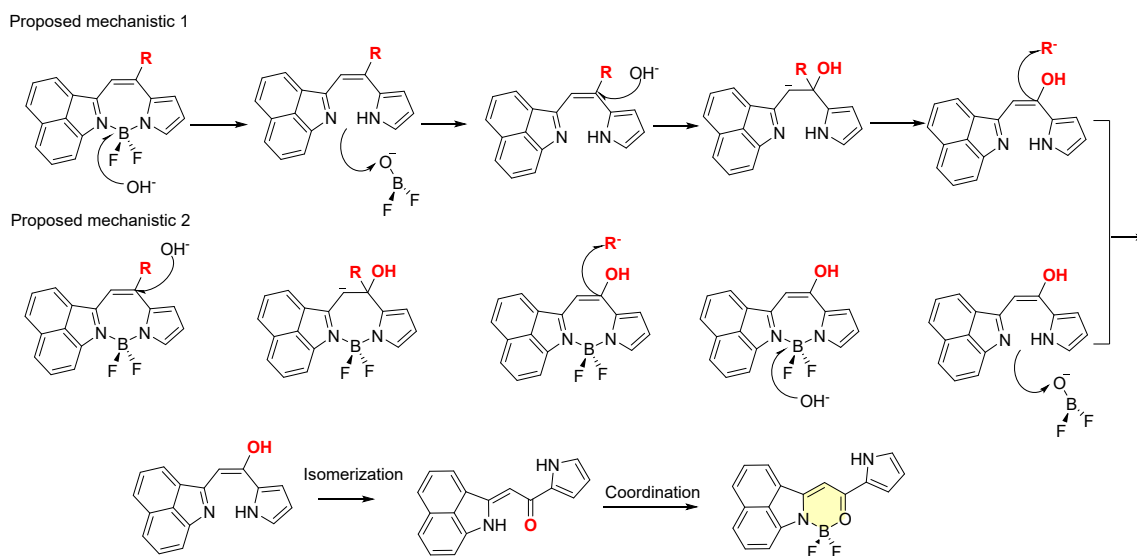

Scheme S2 The proposed mechanistic schemes for the conversion of BOPYIN derivatives to the six-membered BODIPY analogue **11**

### 4.1 General procedure of **5** ~ **9** and **11** ~ **12**

**5**

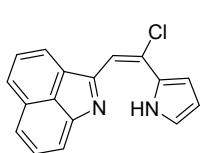

A mixture of 1,8-naphthalimide (507.55 mg, 3.0 mmol) and 2-acetylpyrrole (491.10 mg, 4.5 mmol) was dissolved in toluene (25 mL). The reaction mixture was heated to 120 °C in an oil bath, followed by the slow dropwise addition of POCl<sub>3</sub> (825  $\mu$ L, 9.0 mmol).

The system was refluxed for 3 h, and the reaction progress was monitored by thin-layer chromatography (TLC). After completion, the mixture was quenched with water and neutralized to pH 8 using an aqueous NaOH solution. The organic phase was extracted with dichloromethane, concentrated under reduced pressure, and dried. Purification by column chromatography (petroleum ether/dichloromethane, v/v) afforded **5** as a dark

red solid with a green metallic luster in 33% yield.  $^1\text{H}$  NMR (400 MHz, Chloroform- $d$ )  $\delta$  15.93 (s, 1H), 8.06 – 8.00 (m, 2H), 7.83 – 7.76 (m, 2H), 7.71 (d,  $J$  = 7.5 Hz, 1H), 7.62 (dd,  $J$  = 8.4, 6.9 Hz, 1H), 7.29 – 7.26 (m, 1H), 7.04 – 6.98 (m, 2H), 6.46 – 6.42 (m, 1H).  $^{13}\text{C}$  NMR (101 MHz, Chloroform- $d$ )  $\delta$  162.51, 151.21, 136.91, 136.86, 130.73, 130.00, 129.70, 129.32, 128.54, 127.76, 125.91, 124.83, 123.81, 121.08, 117.63, 111.28, 109.83. HRMS(ESI) Calcd for  $\text{C}_{17}\text{H}_{12}\text{ClN}_2[\text{M}+\text{H}]^+$ : 279.0689, found 279.0770.

6

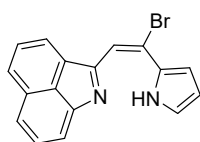

The reaction was carried out following the same procedure as described for compound **5**, but with  $\text{POCl}_3$  replaced by  $\text{POBr}_3$ , affording compound **6** in 15% yield.  $^1\text{H}$  NMR (400 MHz, Chloroform- $d$ )  $\delta$  15.94 (s, 1H), 8.01 (dd,  $J$  = 7.5, 4.1 Hz, 2H), 7.83

– 7.76 (m, 2H), 7.69 (t,  $J$  = 7.5 Hz, 1H), 7.65 – 7.58 (m, 1H), 7.30 (d,  $J$  = 2.0 Hz, 1H), 7.25 (s, 1H), 7.05 – 7.00 (m, 1H), 6.46 – 6.40 (m, 1H).  $^{13}\text{C}$  NMR (101 MHz, Chloroform- $d$ )  $\delta$  162.69, 151.09, 136.74, 131.00, 130.72, 129.70, 129.29, 128.53, 127.78, 127.67, 126.01, 124.91, 124.01, 121.23, 120.28, 113.55, 111.43. HRMS(ESI) Calcd for  $\text{C}_{17}\text{H}_{12}\text{BrN}_2[\text{M}+\text{H}]^+$ : 323.0184, found 323.0191.

7

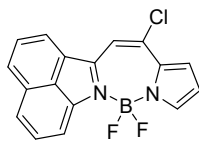

Intermediate **5** (278.06 mg, 1.0 mmol) was dissolved in toluene (10 mL) and heated to 120 °C. Subsequently, triethylamine ( $\text{Et}_3\text{N}$ , 417  $\mu\text{L}$ , 3.0 mmol) and boron trifluoride diethyl etherate ( $\text{BF}_3 \cdot \text{Et}_2\text{O}$ ) were added sequentially. The reaction mixture was refluxed for 10 min, and the completion of the reaction was monitored by thin-layer chromatography (TLC). After removal of the solvent under reduced pressure, the crude product was purified by column chromatography using a mixture of petroleum ether and ethyl acetate (25:1, v/v) as the eluent, affording **7** as a black solid with a green metallic luster in 97% yield.  $^1\text{H}$  NMR (400 MHz,  $\text{DMSO}-d_6$ )  $\delta$  8.71 (d,  $J$  = 7.2 Hz, 1H), 8.35 (d,  $J$  = 7.9 Hz, 1H), 8.07 (d,  $J$  = 7.4 Hz, 1H), 7.97 (d,  $J$  = 8.2 Hz, 1H), 7.88 (t,  $J$  = 7.6 Hz, 1H), 7.76–7.68 (m, 2H), 7.52 (s, 1H), 7.31 (d,  $J$  = 3.9 Hz, 1H), 6.65 (dd,  $J$  = 4.0, 2.2 Hz, 1H).  $^{13}\text{C}$  NMR (101 MHz,  $\text{DMSO}-d_6$ )  $\delta$  143.3, 142.2, 135.4, 133.7, 132.6, 131.3, 130.6, 130.4, 130.1, 129.0, 127.4, 124.2, 123.6, 120.9, 120.8, 114.6, 105.7. HRMS(ESI) Calcd for  $\text{C}_{17}\text{H}_{10}\text{BClF}_2\text{N}_2\text{Na}[\text{M}+\text{Na}]^+$ : 349.0491, found 349.0497.

8

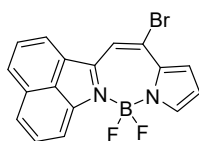

The target compound was synthesized using an analogous procedure to that of **7**, with **6** being employed as the starting material instead of **5**. The target compound **8** was obtained as a black solid exhibiting green metallic luster, with a yield of 92%.  $^1\text{H}$  NMR (400 MHz,  $\text{DMSO}-d_6$ )  $\delta$  8.86 (d,  $J$  = 7.3 Hz, 1H), 8.48 (d,  $J$  = 8.0 Hz, 1H), 8.17 (d,  $J$  = 7.3 Hz, 1H), 8.10 (d,  $J$  = 8.2 Hz, 1H), 7.97 (t,  $J$  = 7.6 Hz, 1H), 7.83–7.74 (m, 3H), 7.29 (d,  $J$  = 3.9 Hz, 1H), 6.63 (dd,  $J$  = 3.9, 2.2 Hz, 1H).  $^{13}\text{C}$  NMR (101 MHz,  $\text{DMSO}-d_6$ )  $\delta$  157.5, 142.2,

135.4, 135.2, 134.0, 133.7, 131.1, 130.7, 130.4, 130.2, 129.0, 127.5, 125.9, 124.2, 121.0, 114.7, 109.2. HRMS(ESI) Calcd for  $C_{17}H_{10}BBrF_2N_2Na[M+Na]^+$ : 392.9986, found 392.9993.

9

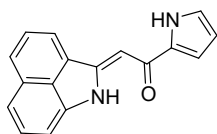

Under the standard conditions, a solution of parent dye **7** (326 mg, 1.0 mmol) in a mixed solvent of dichloromethane (10 mL) and methanol (10 mL) was treated dropwise with an aqueous NaOH solution (60 mg, 1.5 mmol in 1 mL  $H_2O$ ) at 40 °C. The resulting mixture was stirred at the same temperature for 8 h, during which TLC monitoring indicated complete consumption of the starting material and full conversion to product **9**. After concentration under reduced pressure, the crude product was purified by column chromatography (petroleum ether/dichloromethane, v/v = 5:2) to afford **9** as a yellow solid in 79% yield.  $^1H$  NMR (400 MHz,  $DMSO-d_6$ )  $\delta$  11.64 (s, 1H), 11.31 (s, 1H), 8.20 (d,  $J$  = 7.1 Hz, 1H), 7.97 (d,  $J$  = 8.0 Hz, 1H), 7.72 (t,  $J$  = 7.6 Hz, 1H), 7.48 – 7.39 (m, 2H), 7.11 (d,  $J$  = 5.9 Hz, 2H), 7.05 (d,  $J$  = 3.1 Hz, 1H), 6.96 (s, 1H), 6.23 (dd,  $J$  = 3.8, 2.1 Hz, 1H).  $^{13}C$  NMR (101 MHz,  $DMSO-d_6$ )  $\delta$  179.54, 151.78, 142.89, 134.25, 133.28, 130.44, 129.99, 129.14, 128.70, 125.88, 124.40, 121.40, 118.24, 114.06, 110.02, 106.30, 92.28. HRMS (ESI) Calcd. for  $C_{17}H_{13}N_2O [M+H]^+$ : 261.1032, found 261.1028.

11

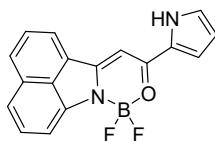

A solution of either **9** or **12** (261.1 mg, 1.0 mmol) in anhydrous toluene (25 mL) was charged sequentially with triethylamine (697  $\mu$ L, 5 mmol) and boron trifluoride diethyl etherate (634  $\mu$ L, 5 mmol) under nitrogen atmosphere. The reaction mixture was heated to reflux (120°C) with vigorous stirring for 20 minutes, with reaction progress monitored by thin-layer chromatography (TLC). Upon complete consumption of starting material as confirmed by TLC analysis, the mixture was concentrated under reduced pressure. The crude product was purified by flash column chromatography using a petroleum ether/dichloromethane (3:1, v/v) gradient system to afford **11** as an orange-red crystalline solid in 98% isolated yield.  $^1H$  NMR (600 MHz,  $DMSO-d_6$ )  $\delta$  12.43, 8.49 (d,  $J$  = 6.9 Hz), 8.35 (d,  $J$  = 7.8 Hz), 7.94 (t,  $J$  = 7.3 Hz), 7.85 (d,  $J$  = 8.1 Hz), 7.68 (t,  $J$  = 7.4 Hz), 7.54 (d,  $J$  = 6.9 Hz), 7.43, 7.39, 7.34, 6.43.  $^{13}C$  NMR (151 MHz,  $DMSO-d_6$ )  $\delta$  166.26, 160.68, 142.03, 133.48, 130.37, 130.17, 130.02, 128.78, 127.64 (d,  $J$  = 11.7 Hz), 126.09, 123.70, 118.45, 113.75, 112.83, 89.09. HRMS (ESI) Calcd. for  $C_{17}H_{11}N_2ONaBF_2 [M+Na]^+$ : 331.0828, found 331.0830.

12

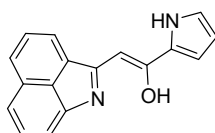

**5** (278 mg, 1.0 mmol) was dissolved in a mixed solvent of dichloromethane (10 mL) and methanol (10 mL), to which an aqueous solution of sodium hydroxide (60 mg, 1.5 mmol in 1 mL

H<sub>2</sub>O) was added dropwise. The reaction mixture was stirred at room temperature for 4 h, with the reaction progress monitored by thin-layer chromatography (TLC). Upon completion of the reaction as indicated by TLC, the mixture was concentrated under reduced pressure. The crude product was purified by column chromatography using a mixture of petroleum ether and dichloromethane (v/v = 5:1) as eluent to afford **12** as a rose-red solid in 70% yield. <sup>1</sup>H NMR (400 MHz, DMSO-d<sub>6</sub>) δ 11.65 (s, 1H), 11.31 (s, 1H), 8.20 (d, J = 7.1 Hz, 1H), 7.97 (d, J = 8.0 Hz, 1H), 7.72 (t, J = 7.6 Hz, 1H), 7.47 – 7.40 (m, 2H), 7.11 (d, J = 6.2 Hz, 2H), 7.05 (s, 1H), 6.97 (s, 1H), 6.25 – 6.20 (m, 1H). <sup>13</sup>C NMR (101 MHz, DMSO-d<sub>6</sub>) δ 179.52, 151.76, 142.90, 134.24, 133.28, 130.43, 130.00, 129.15, 128.70, 125.87, 124.41, 121.41, 118.23, 114.07, 110.02, 106.31, 92.29. HRMS (ESI) Calcd. for C<sub>17</sub>H<sub>13</sub>N<sub>2</sub>O [M+H]<sup>+</sup>: 261.1025, found 261.1028.

## 4.2 General procedure of **10a** ~ **10e**

A solution of the parent dye **7** (326 mg, 1.0 mmol) in dichloromethane (10 mL) was treated sequentially with reagents **a**~**e** (10.0 mmol each) and cesium carbonate (1.3 g, 4.0 mmol). The reaction mixture was heated to 60 °C and refluxed for 1.5~8 h, with progress monitored by TLC until completion. After quenching with water, the organic phase was extracted with dichloromethane, concentrated under reduced pressure, and dried. Purification by column chromatography using a mixed eluent of petroleum ether/dichloromethane (v/v) afforded the target compounds **10a**~**e** as dark red solids in yields ranging from 52% to 95%.

### 10a

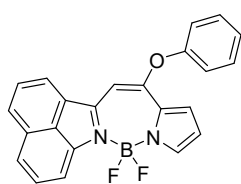

Following the general procedure, product **10a** was obtained as a dark red solid in 93% yield. <sup>1</sup>H NMR (400 MHz, DMSO-d<sub>6</sub>) δ 8.43 (d, J = 8.0 Hz, 1H), 8.22 (d, J = 7.3 Hz, 1H), 8.09 (d, J = 7.3 Hz, 1H), 8.01 (d, J = 8.2 Hz, 1H), 7.89 (t, J = 7.7 Hz, 1H), 7.79 (t, J = 7.8 Hz, 1H), 7.70 (s, 1H), 7.57 (t, J = 8.0 Hz, 2H), 7.33 (td, J = 15.1, 13.9, 5.6 Hz, 4H), 6.64-6.56 (m, 2H). <sup>13</sup>C NMR (101 MHz, DMSO-d<sub>6</sub>) δ 162.9, 154.7, 134.4, 130.5, 130.3, 129.9, 129.2, 128.1, 125.7, 125.6, 120.1, 118.9, 113.4, 92.3. HRMS (ESI) Calcd for C<sub>23</sub>H<sub>15</sub>BF<sub>2</sub>N<sub>2</sub>ONa [M+Na]<sup>+</sup>: 407.1143, found 407.1148.

### 10b

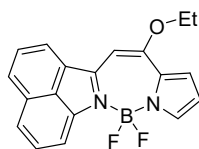

Following the general procedure, product **10b** was obtained as a dark red solid in 65% yield. <sup>1</sup>H NMR (400 MHz, DMSO-d<sub>6</sub>) δ 8.78 (d, J = 7.2 Hz, 1H), 8.37 (d, J = 8.0 Hz, 1H), 7.95 (dd, J = 21.5, 7.6 Hz, 3H), 7.72 (t, J = 7.8 Hz, 1H), 7.54 (s, 1H), 7.15 (d, J = 3.7 Hz, 1H), 6.85 (s, 1H), 6.53-6.44 (m, 1H), 4.56 (q, J = 6.9 Hz, 2H), 1.51 (t, J = 6.9 Hz, 3H). <sup>13</sup>C NMR (101 MHz, DMSO-d<sub>6</sub>) δ 165.0, 143.2, 133.6, 130.3, 130.0, 129.5, 129.2, 128.2, 124.8,

118.6, 112.1, 87.3, 66.1, 14.3. HRMS(ESI) Calcd for  $C_{19}H_{15}BF_2N_2ONa[M+Na]^+$ : 359.1143, found 359.1149.

#### 10c

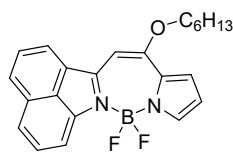

Following the general procedure, product **10c** was obtained as a dark red solid in 85% yield.  $^1H$  NMR (400 MHz, DMSO- $d_6$ )  $\delta$  8.74 (d,  $J$  = 7.3 Hz, 1H), 8.33 (d,  $J$  = 7.9 Hz, 1H), 7.96 (d,  $J$  = 7.2 Hz, 1H), 7.89 (dd,  $J$  = 8.1, 3.9 Hz, 2H), 7.70 (t,  $J$  = 7.6 Hz, 1H), 7.54 (s, 1H), 7.13 (d,  $J$  = 3.7 Hz, 1H), 6.83 (s, 1H), 6.49 (t,  $J$  = 3.0 Hz, 1H), 4.46 (t,  $J$  = 6.3 Hz, 2H), 1.86 (t,  $J$  = 7.2 Hz, 2H), 1.51 (t,  $J$  = 7.5 Hz, 2H), 1.35 (tt,  $J$  = 7.7, 4.6 Hz, 4H), 0.89 (t,  $J$  = 6.7 Hz, 3H).  $^{13}C$  NMR (101 MHz, DMSO- $d_6$ )  $\delta$  165.1, 133.6, 130.3, 130.0, 129.5, 128.2, 124.8, 118.4, 112.2, 87.3, 70.1, 30.8, 28.3, 25.2, 22.1, 13.9. HRMS(ESI) Calcd for  $C_{23}H_{23}BF_2N_2ONa[M+Na]^+$ : 415.1769, found 415.1776.

#### 10d

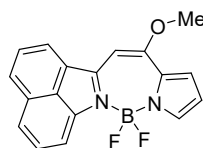

Following the general procedure, product **10d** was obtained as a dark red solid in 52% yield.  $^1H$  NMR (400 MHz, DMSO- $d_6$ )  $\delta$  8.82 (d,  $J$  = 7.2 Hz, 1H), 8.41 (d,  $J$  = 8.0 Hz, 1H), 7.98 (dd,  $J$  = 18.5, 7.6 Hz, 3H), 7.74 (t,  $J$  = 7.8 Hz, 1H), 7.55 (s, 1H), 7.19-7.11 (m, 1H), 6.88 (s, 1H), 6.49 (t,  $J$  = 3.0 Hz, 1H), 4.25 (s, 3H).  $^{13}C$  NMR (101 MHz, DMSO- $d_6$ )  $\delta$  165.6, 143.1, 133.8, 132.6, 130.3, 130.1, 129.6, 129.2, 128.3, 124.9, 124.8, 118.5, 117.9, 112.3, 86.9, 57.7. HRMS(ESI) Calcd for  $C_{18}H_{13}BF_2N_2ONa[M+Na]^+$ : 345.0987, found 345.0995.

#### 10e

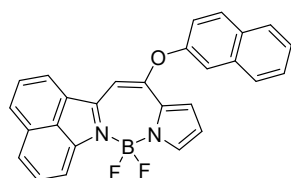

Following the general procedure, product **10e** was obtained as a dark red solid in 95% yield.  $^1H$  NMR (400 MHz, DMSO- $d_6$ )  $\delta$  8.33 (d,  $J$  = 8.0 Hz, 1H), 8.16-8.08 (m, 2H), 8.09-8.00 (m, 2H), 7.95 (t,  $J$  = 7.8 Hz, 2H), 7.85 (d,  $J$  = 2.4 Hz, 1H), 7.79-7.70 (m, 3H), 7.62-7.47 (m, 3H), 7.35 (d,  $J$  = 3.8 Hz, 1H), 6.68-6.57 (m, 2H).  $^{13}C$  NMR (101 MHz, DMSO- $d_6$ )  $\delta$  162.9, 152.2, 142.8, 134.2, 133.9, 132.3, 131.7, 130.8, 130.6, 130.2, 129.7, 129.0, 128.2, 127.9, 127.6, 127.1, 125.8, 125.7, 124.5, 120.3, 119.9, 116.6, 113.5, 92.5. HRMS(ESI) Calcd for  $C_{27}H_{17}BF_2N_2ONa[M+Na]^+$ : 457.1300, found 457.1307.

## 5. NMR and HRMS

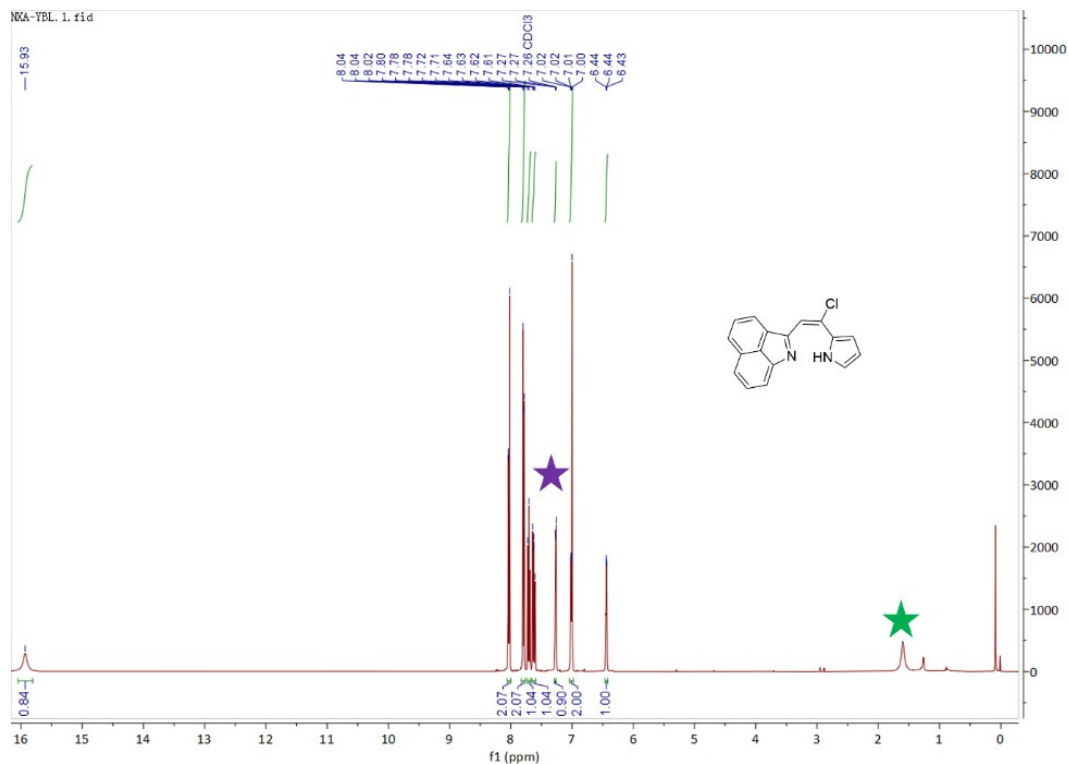

Figure S1  $^1\text{H}$  NMR spectra of **5** in Chloroform- $d_6$  (green star denotes the residual peak of  $\text{H}_2\text{O}$ , purple star denotes the solvent residual peak of Chloroform at 7.26 ppm as the referenced signal).

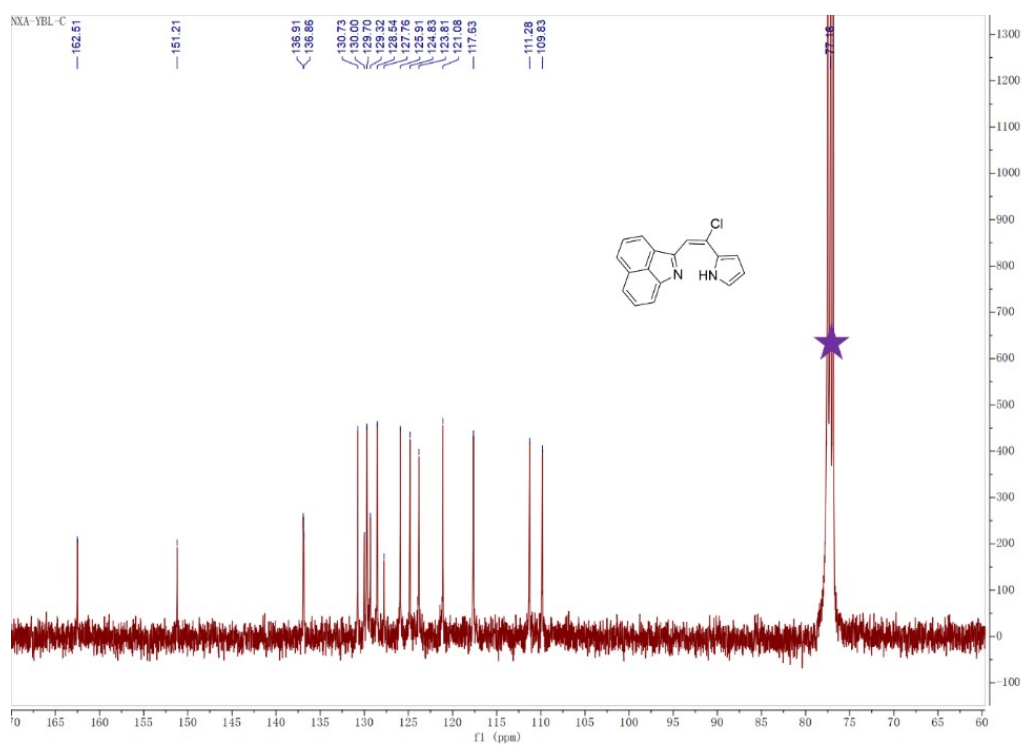



Figure S2  $^{13}\text{C}$  NMR spectra of **5** in Chloroform- $d_6$  (purple star denotes the solvent residual peak of Chloroform at 77.42 ppm as the referenced signal).

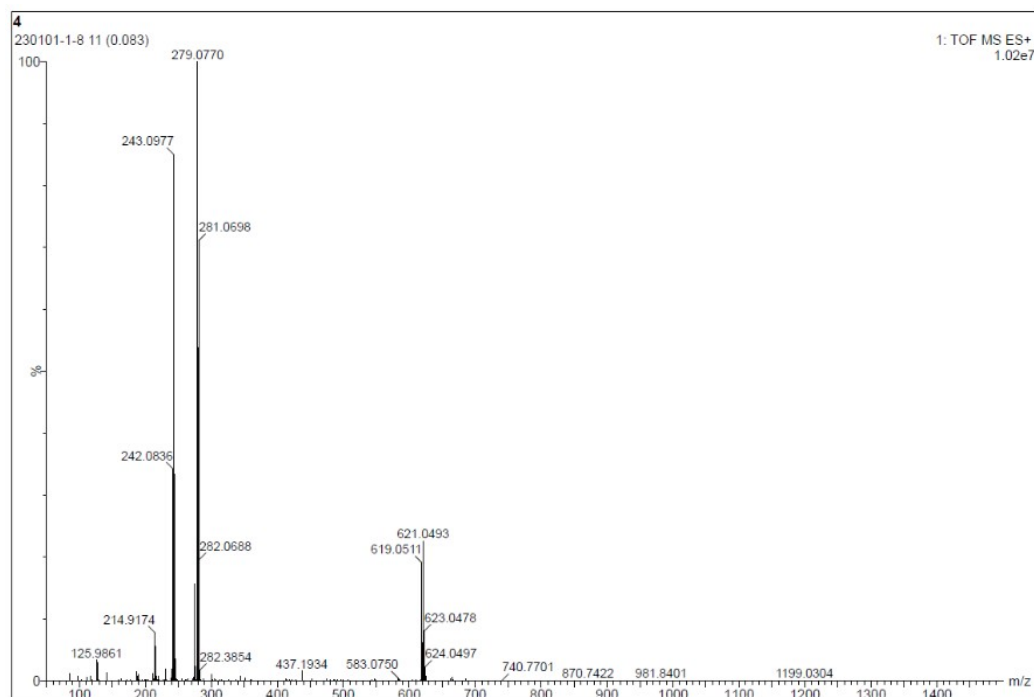

Figure S3 HR-MS spectra of **5**

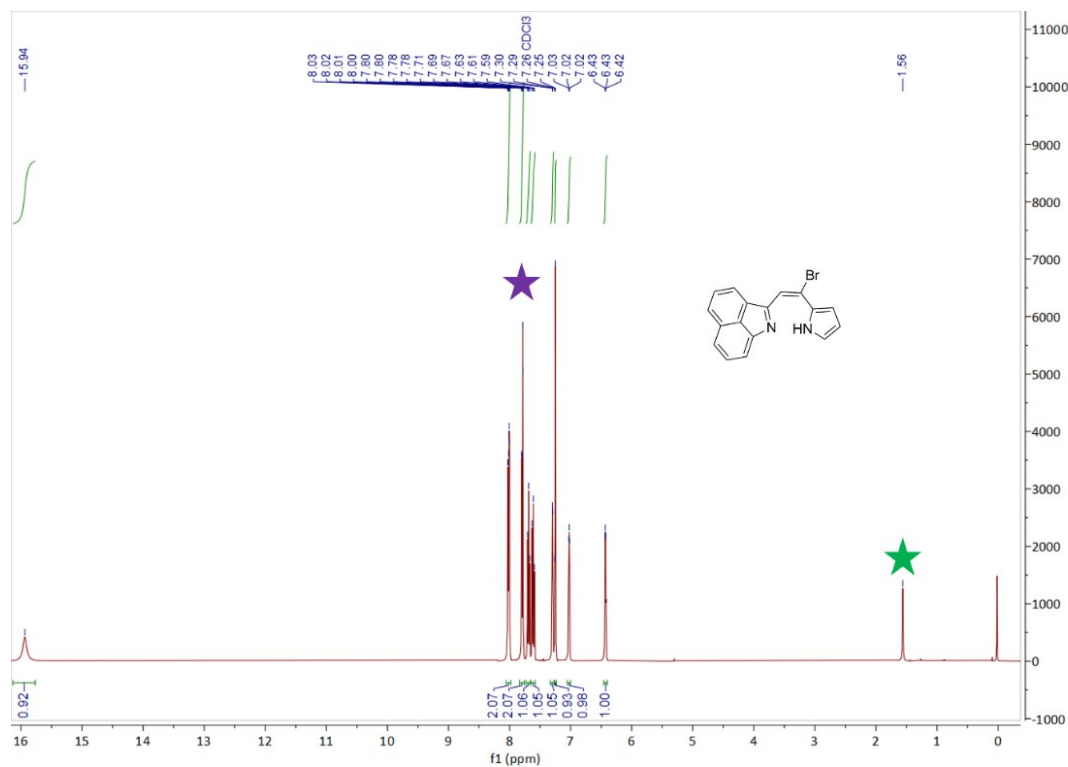

Figure S4  $^1\text{H}$  NMR spectra of **6** in Chloroform- $d_6$  (green star denotes the residual peak of  $\text{H}_2\text{O}$ , purple star denotes the solvent residual peak of Chloroform at 7.26 ppm as the referenced signal).

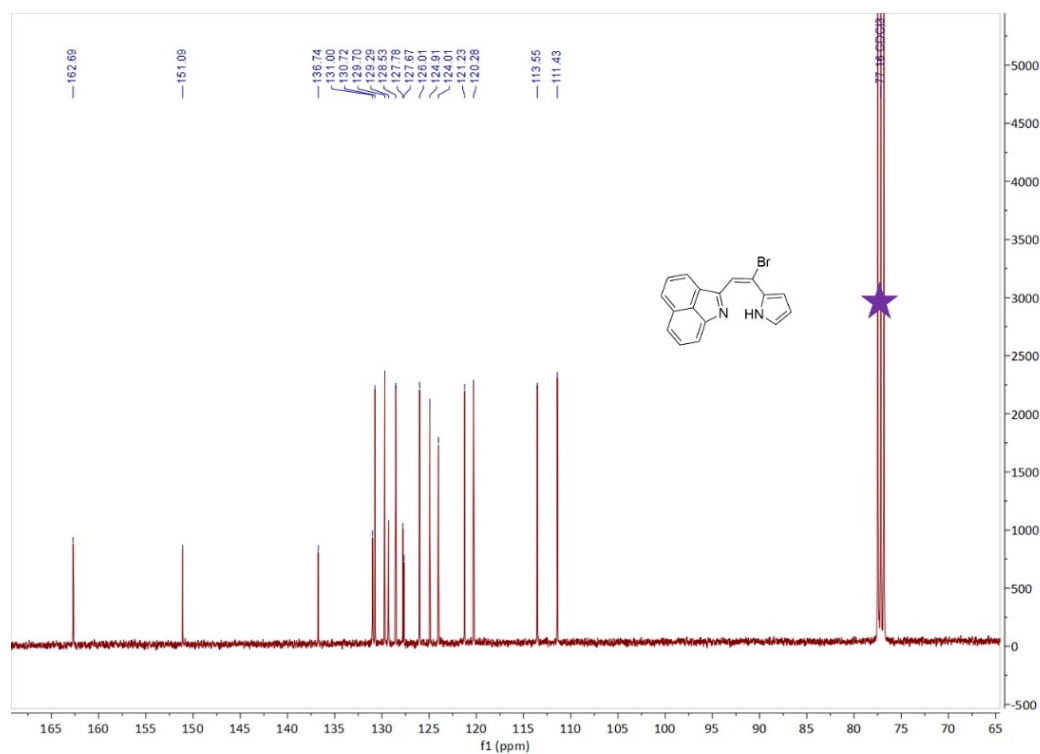

Figure S5 <sup>13</sup>C NMR spectra of **6** in Chloroform-*d*<sub>6</sub> (purple star denotes the solvent residual peak of Chloroform at 76.57 ppm as the referenced signal).

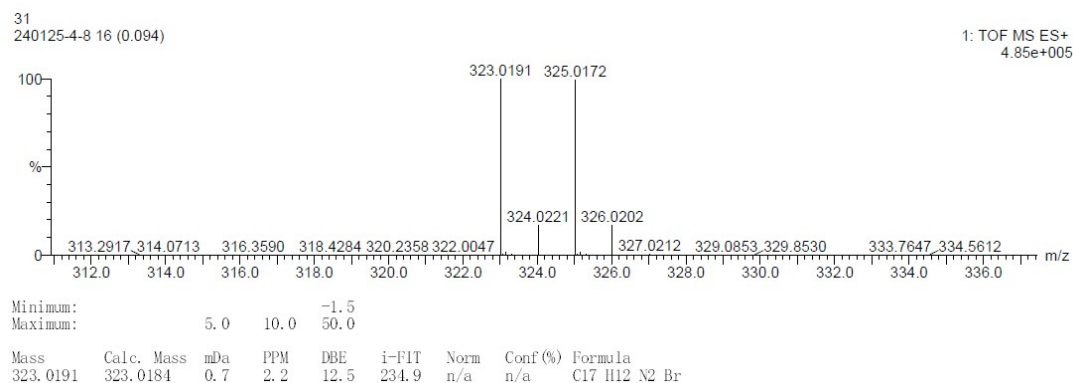

Figure S6 HR-MS spectra of **6**

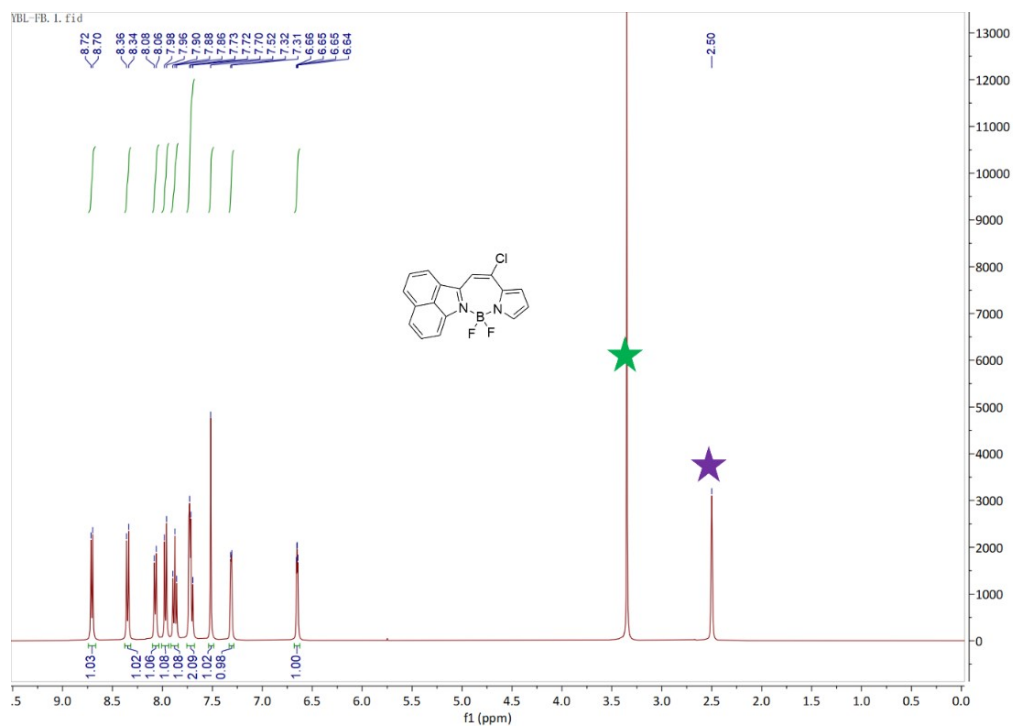

Figure S7  $^1\text{H}$  NMR spectra of **7** in  $\text{DMSO-}d_6$  (green star denotes the residual peak of  $\text{H}_2\text{O}$ , purple star denotes the solvent residual peak of DMSO at 2.50 ppm as the referenced signal).

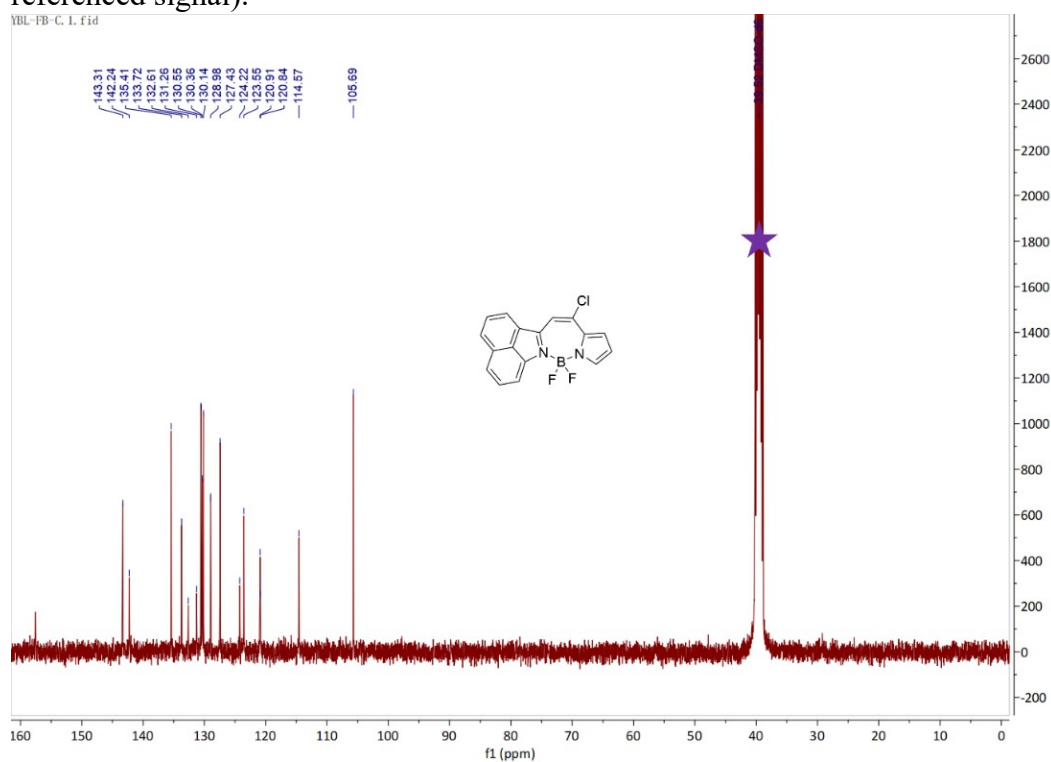

Figure S8  $^{13}\text{C}$  NMR spectra of **7** in  $\text{DMSO-}d_6$  (purple star denotes the solvent residual peak of DMSO at 39.52 ppm as the referenced signal).

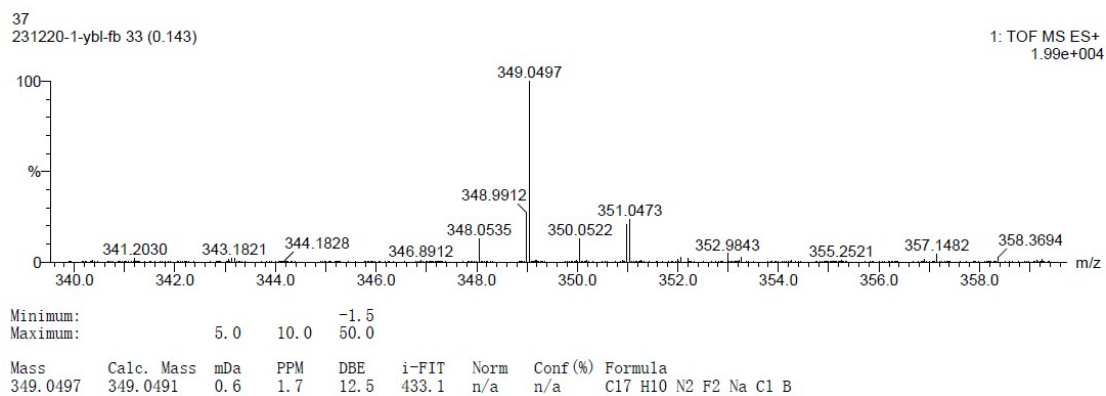

Figure S9 HR-MS spectra of **7**

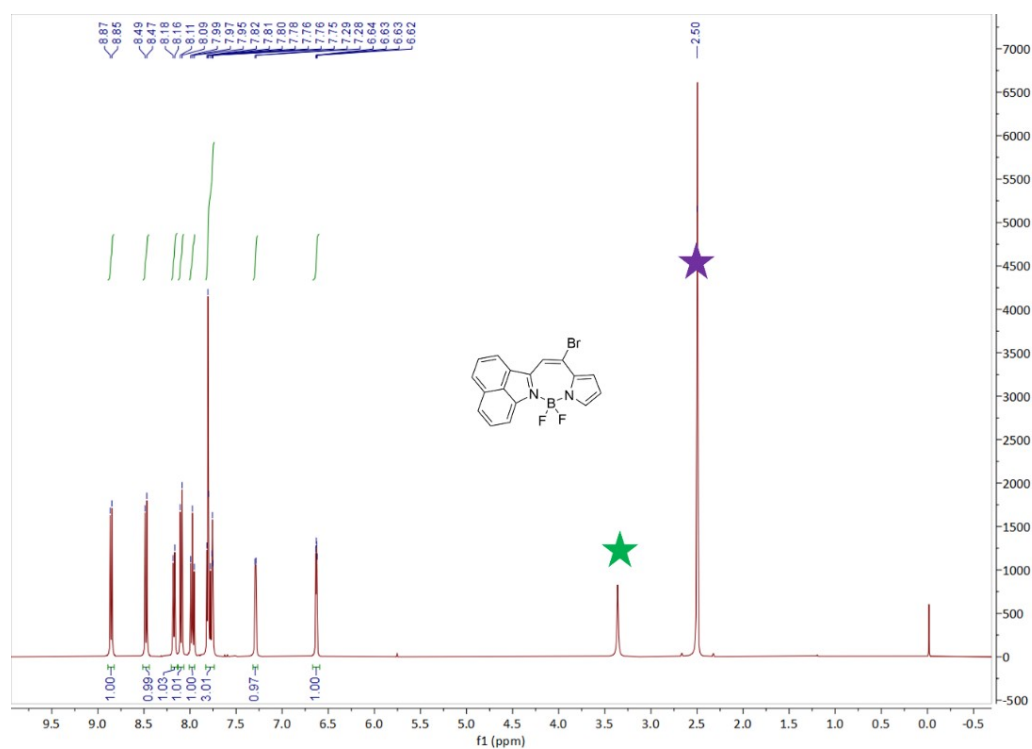

Figure S10  $^1\text{H}$  NMR spectra of **8** in  $\text{DMSO-}d_6$  (green star denotes the residual peak of  $\text{H}_2\text{O}$ , purple star denotes the solvent residual peak of DMSO at 2.50 ppm as the referenced signal).

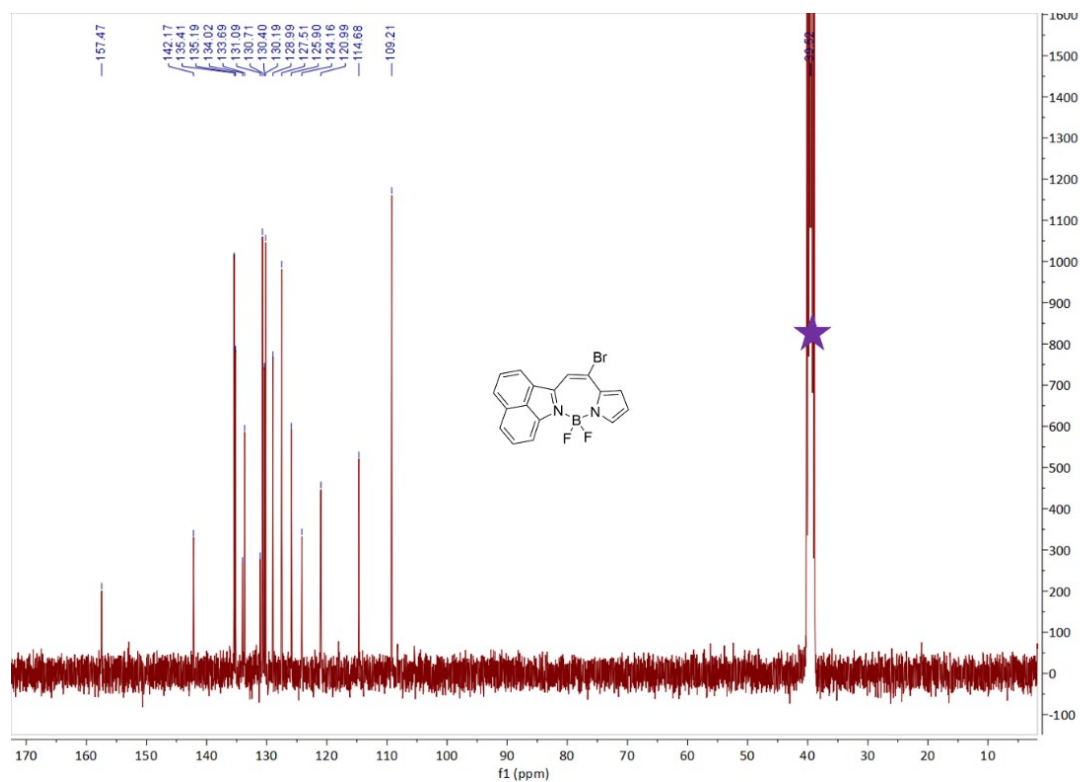

Figure S11 <sup>13</sup>C NMR spectra of **8** in DMSO-*d*<sub>6</sub> (purple star denotes the solvent residual peak of DMSO at 39.52 ppm as the referenced signal).

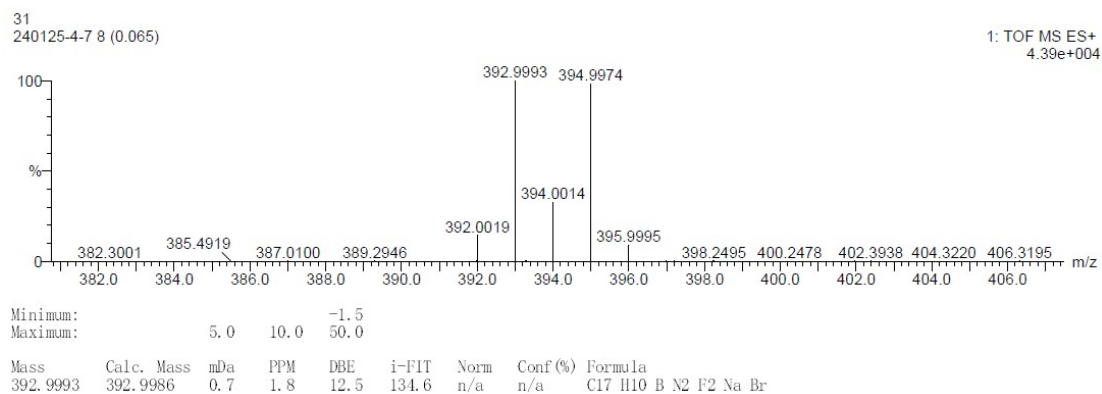

Figure S12 HR-MS spectra of **8**

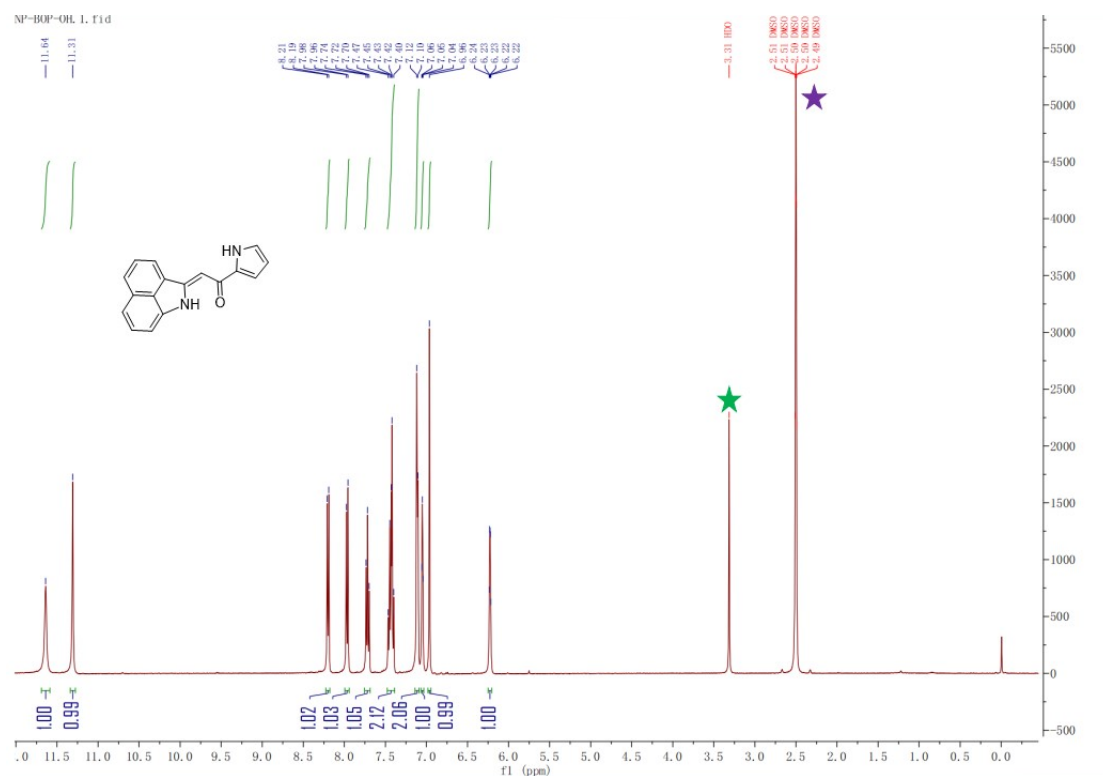

Figure S13 <sup>1</sup>H NMR spectra of **9** in DMSO-*d*<sub>6</sub> (green star denotes the residual peak of H<sub>2</sub>O, purple star denotes the solvent residual peak of DMSO at 2.50 ppm as the referenced signal).

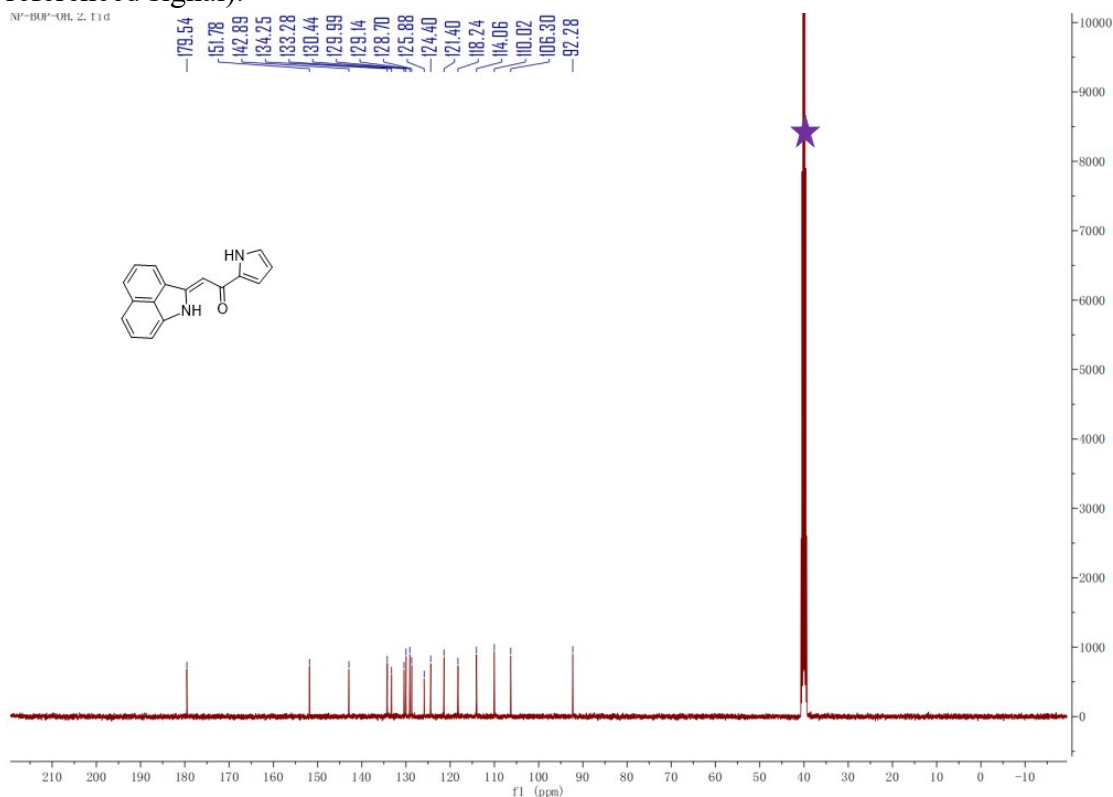

Figure S14 <sup>13</sup>C NMR spectra of **9** in DMSO-*d*<sub>6</sub> (purple star denotes the solvent residual peak of DMSO at 39.52 ppm as the referenced signal).

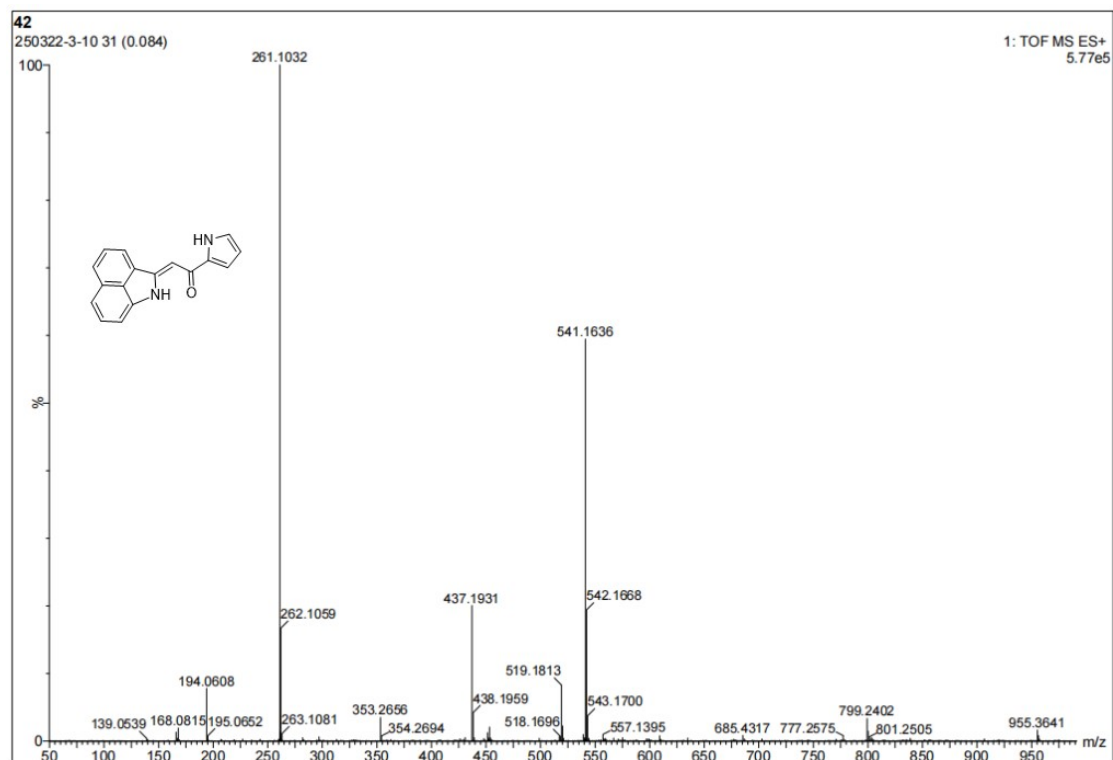

Figure S15 HR-MS spectra of **9**

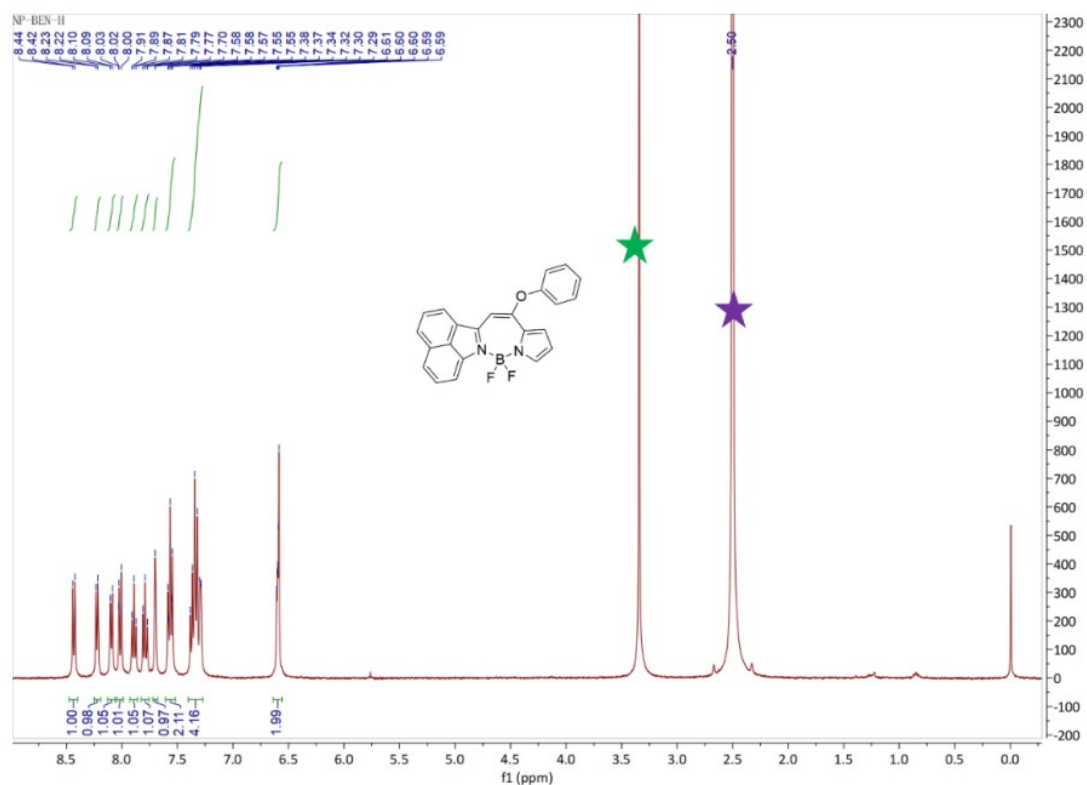

Figure S16  $^1\text{H}$  NMR spectra of **10a** in  $\text{DMSO}-d_6$  (green star denotes the residual peak of  $\text{H}_2\text{O}$ , purple star denotes the solvent residual peak of DMSO at 2.50 ppm as the referenced signal).

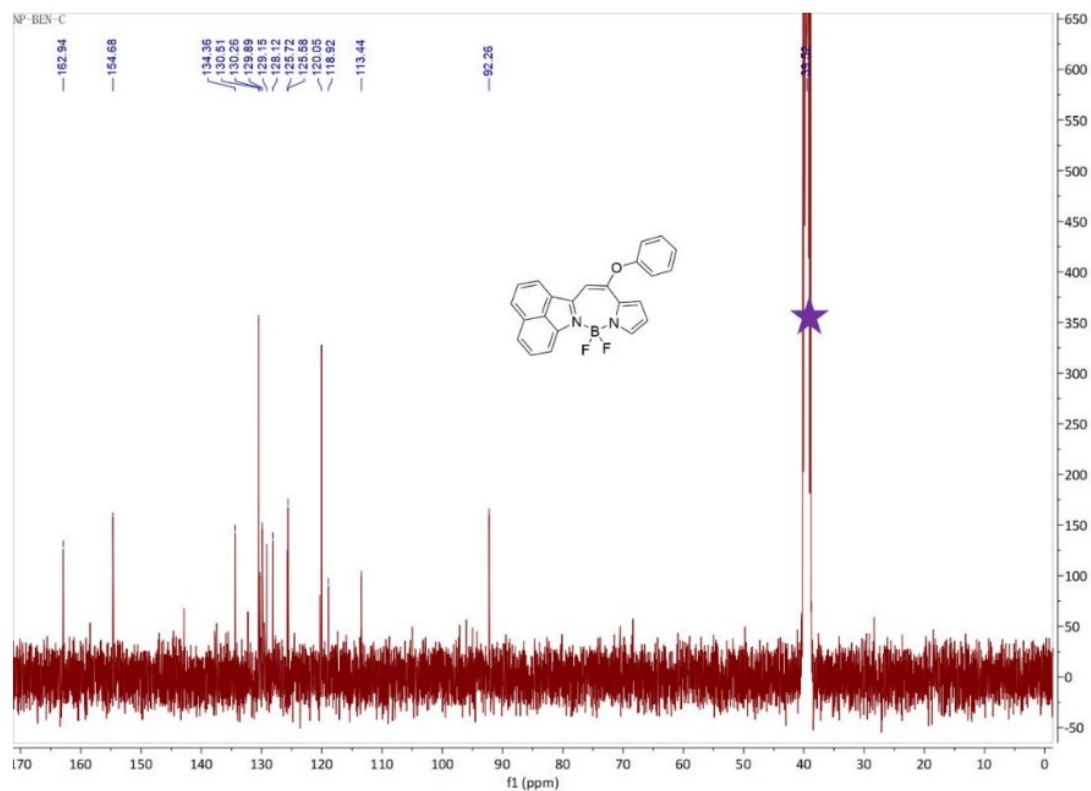

Figure S17 <sup>13</sup>C NMR spectra of **10a** in DMSO-*d*<sub>6</sub> (purple star denotes the solvent residual peak of DMSO at 39.52 ppm as the referenced signal).

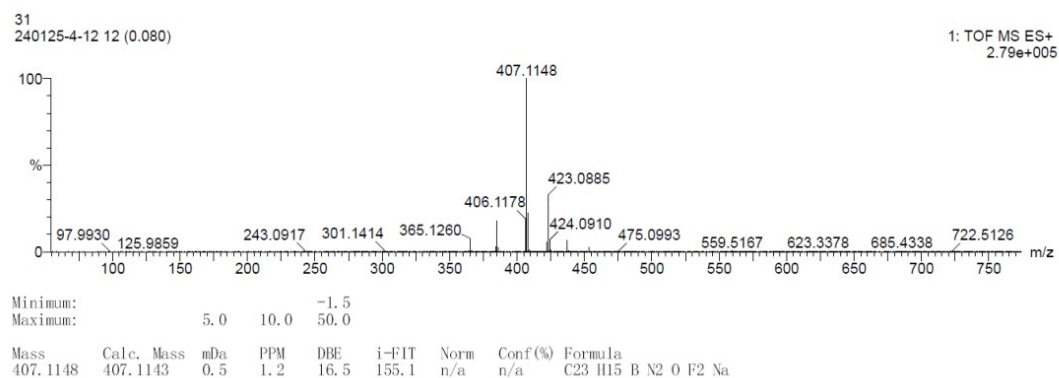

Figure S18 HR-MS spectra of **10a**



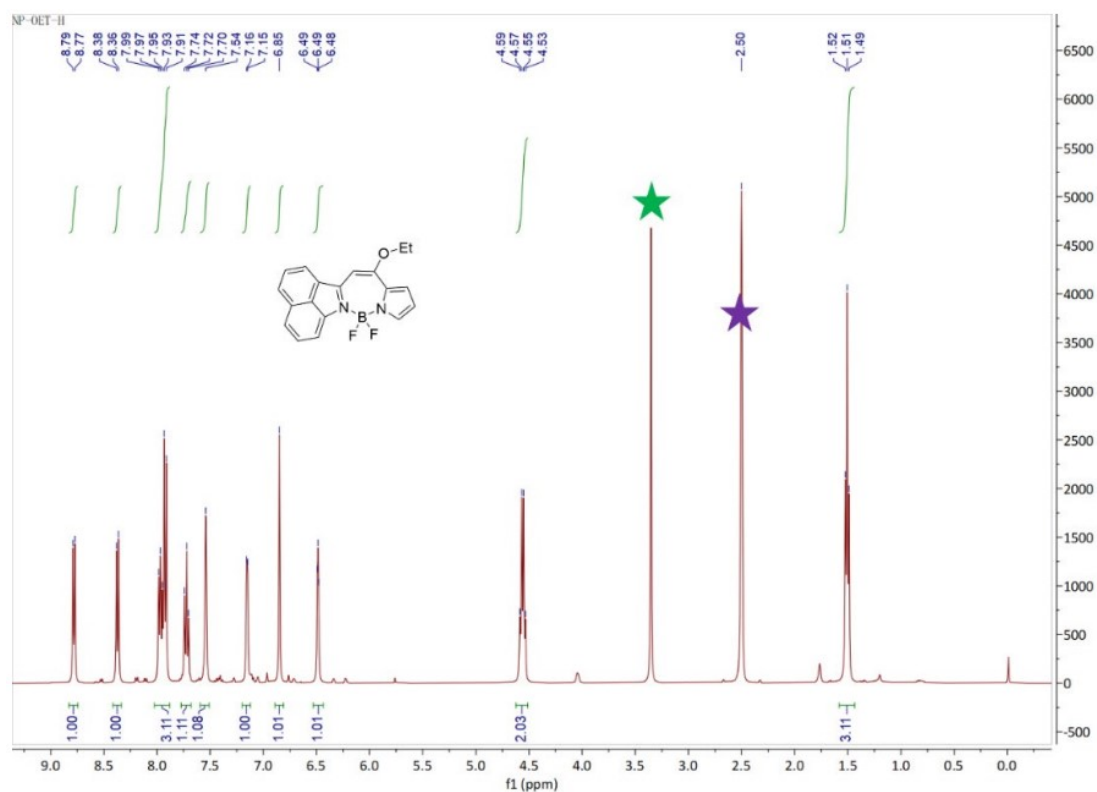

Figure S19  $^1\text{H}$  NMR spectra of **10b** in  $\text{DMSO}-d_6$  (green star denotes the residual peak of  $\text{H}_2\text{O}$ , purple star denotes the solvent residual peak of DMSO at 2.50 ppm as the referenced signal).

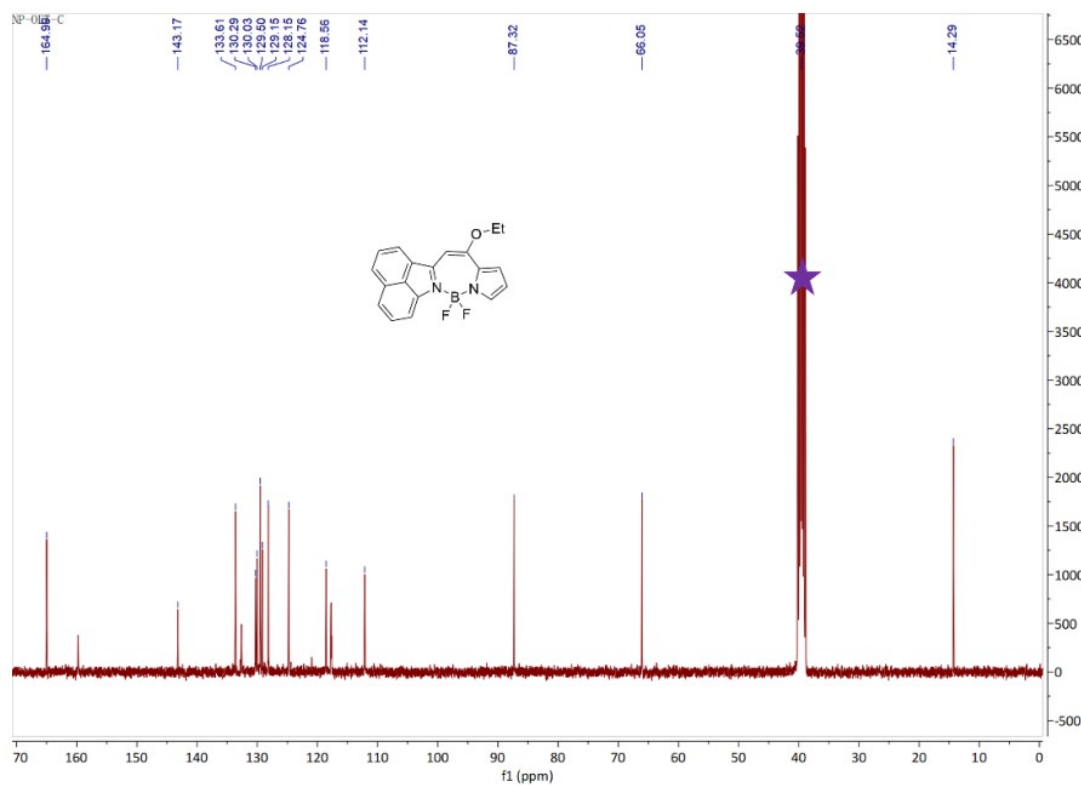

Figure S20  $^{13}\text{C}$  NMR spectra of **10b** in  $\text{DMSO}-d_6$  (purple star denotes the solvent residual peak of DMSO at 39.52 ppm as the referenced signal).

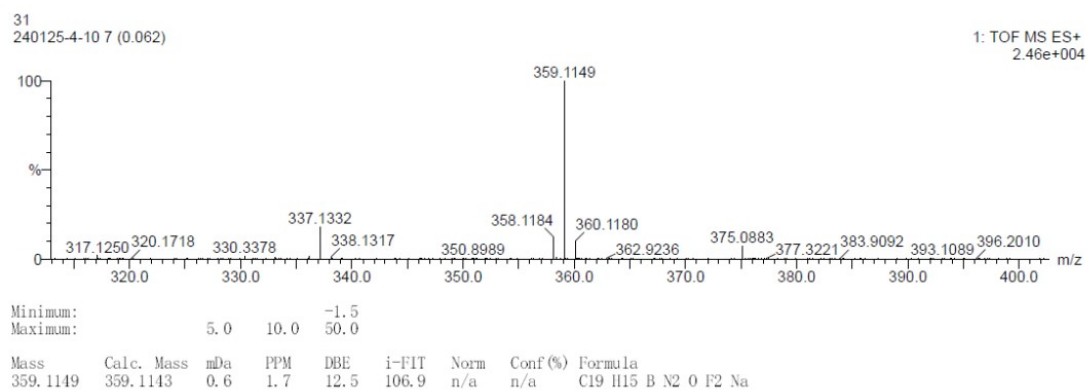

Figure S21 HR-MS spectra of **10b**

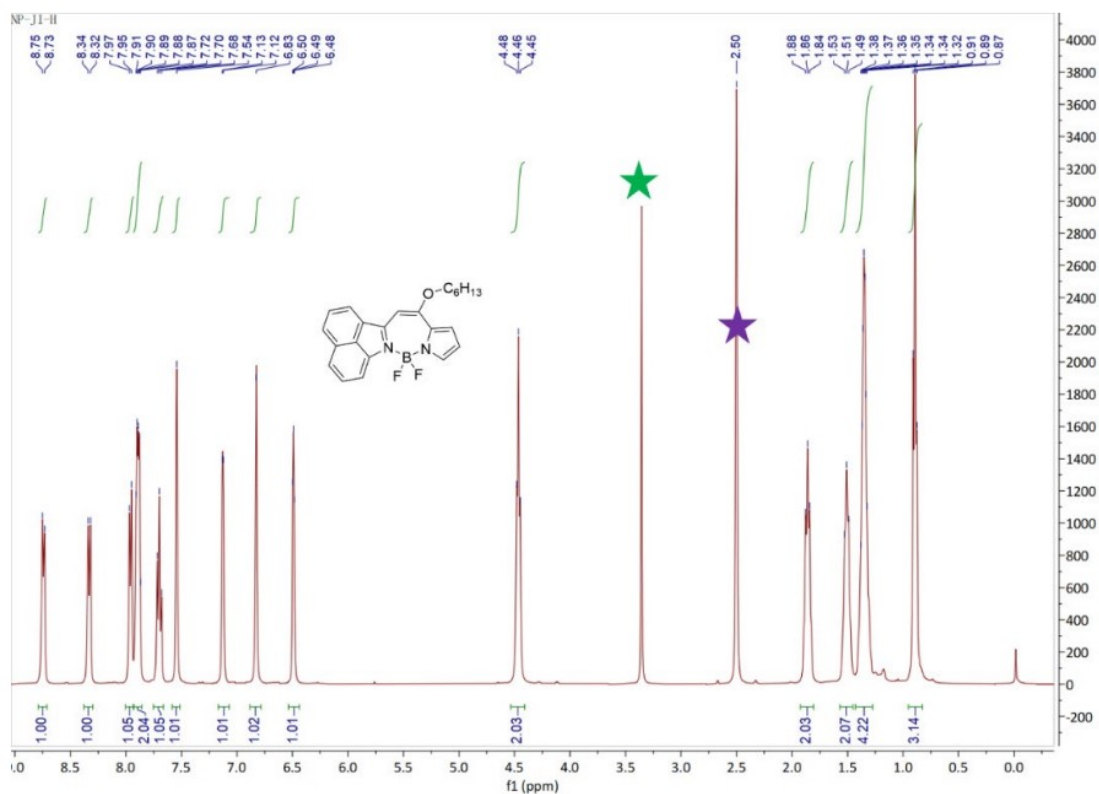

Figure S22  $^1\text{H}$  NMR spectra of **10c** in  $\text{DMSO-}d_6$  (green star denotes the residual peak of  $\text{H}_2\text{O}$ , purple star denotes the solvent residual peak of DMSO at 2.50 ppm as the referenced signal).

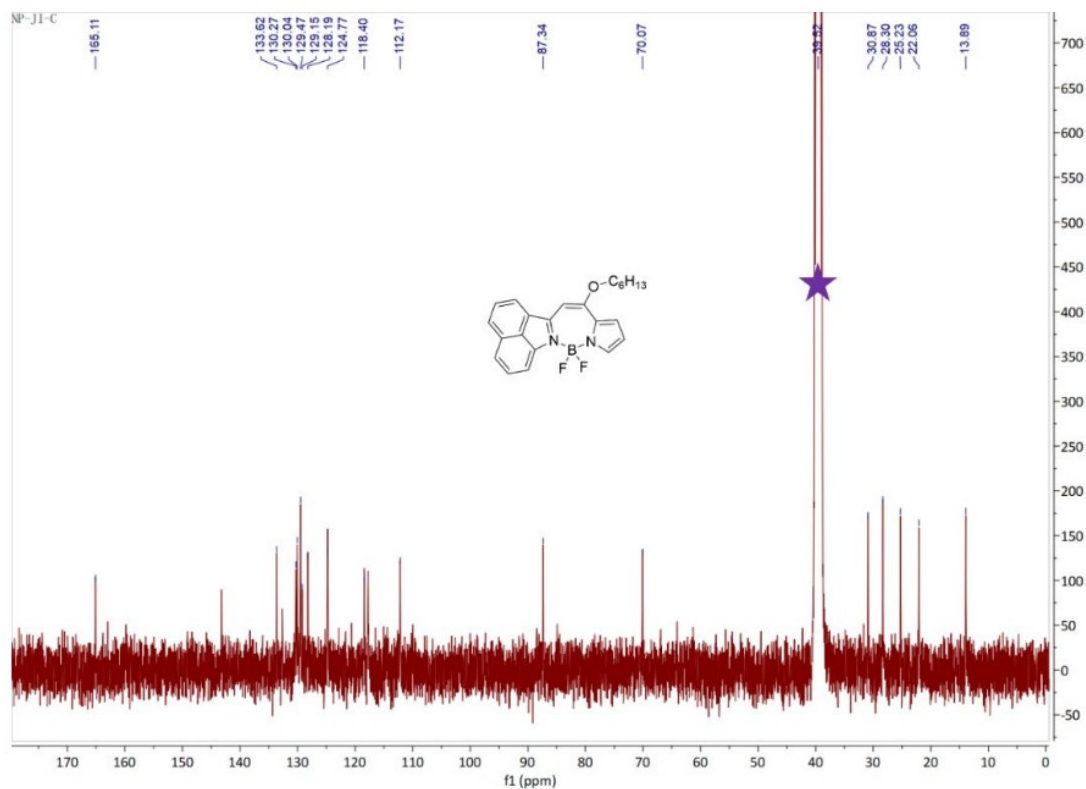

Figure S23  $^{13}\text{C}$  NMR spectra of **10c** in  $\text{DMSO-}d_6$  (purple star denotes the solvent residual peak of DMSO at 39.52 ppm as the referenced signal).

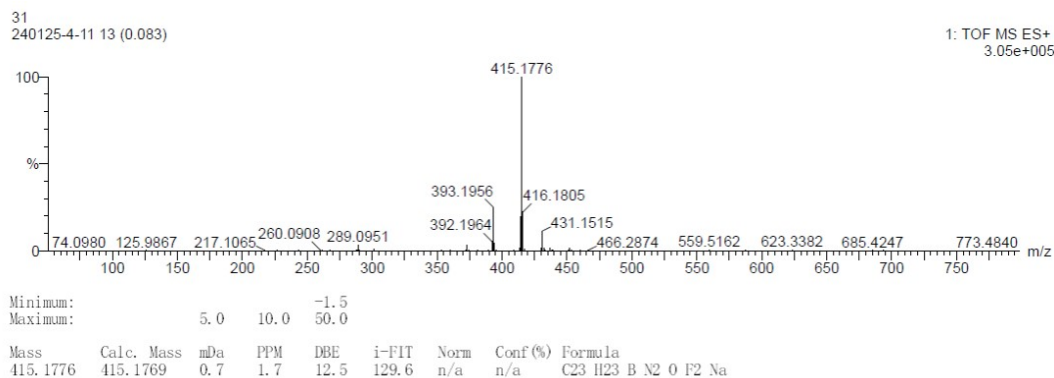

Figure S24 HR-MS spectra of **10c**

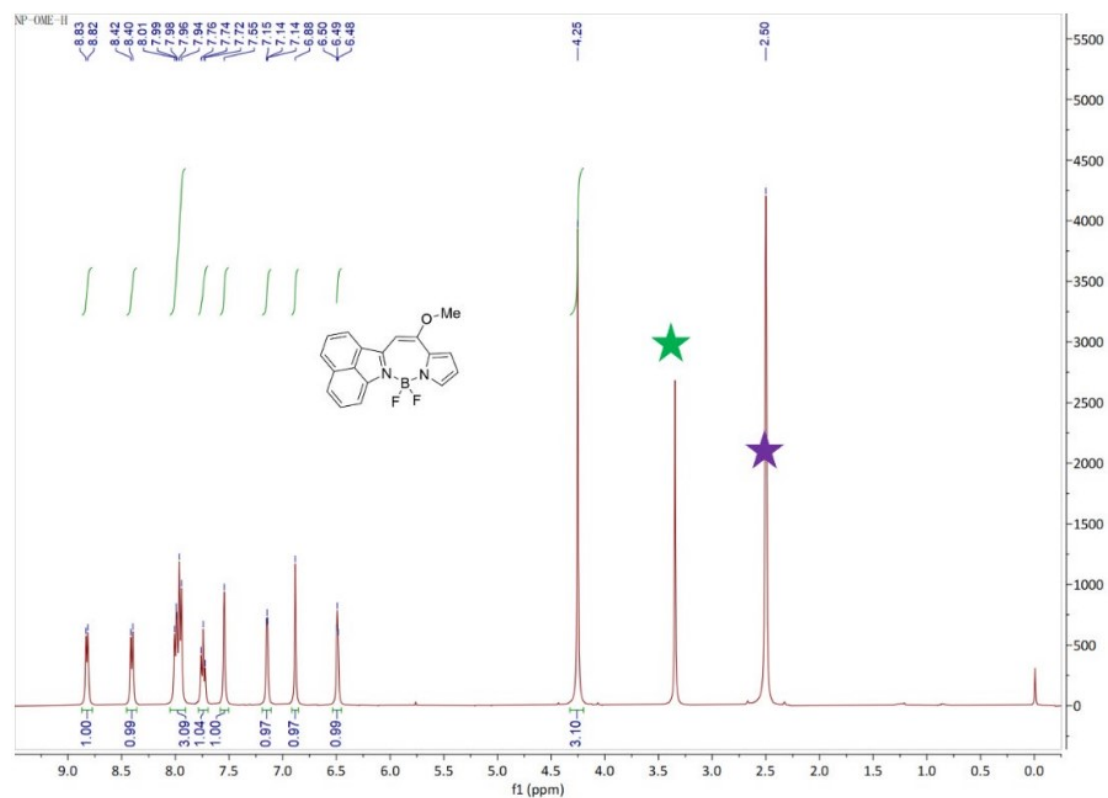

Figure S25  $^1\text{H}$  NMR spectra of **10d** in  $\text{DMSO}-d_6$  (green star denotes the residual peak of  $\text{H}_2\text{O}$ , purple star denotes the solvent residual peak of DMSO at 2.50 ppm as the referenced signal).

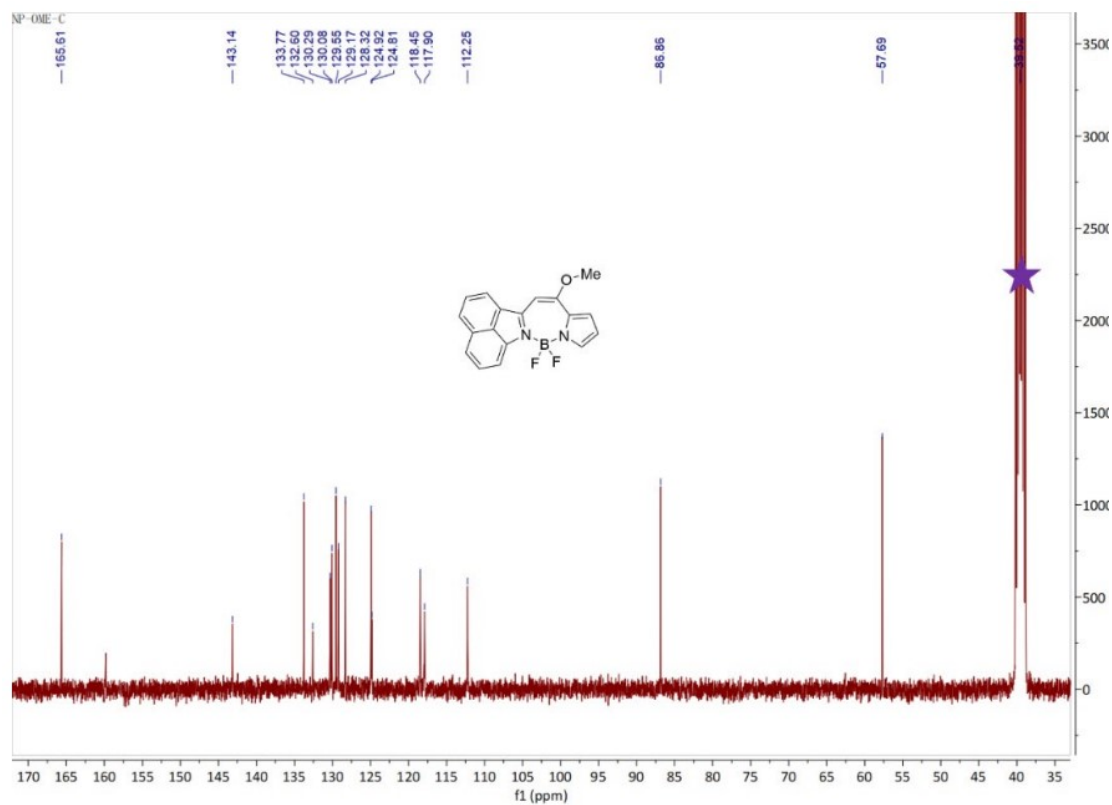

Figure S26  $^{13}\text{C}$  NMR spectra of **10d** in  $\text{DMSO}-d_6$  (purple star denotes the solvent residual peak of DMSO at 39.52 ppm as the referenced signal).

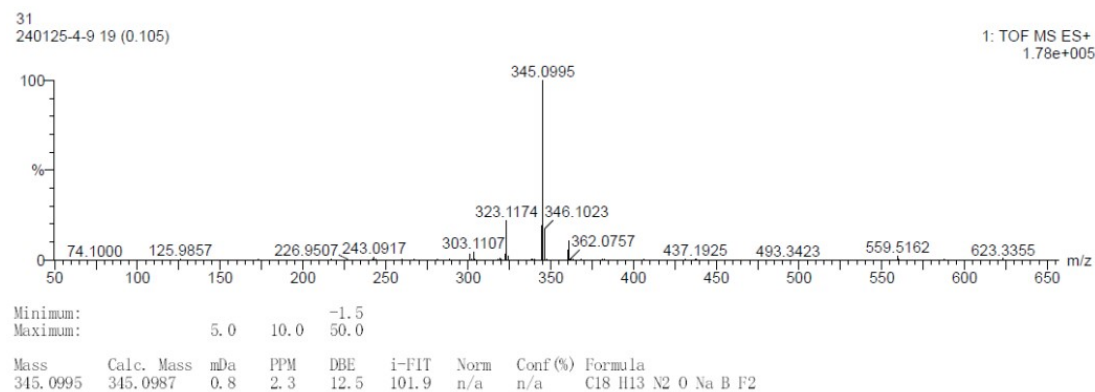

Figure S27 HR-MS spectra of **10d**

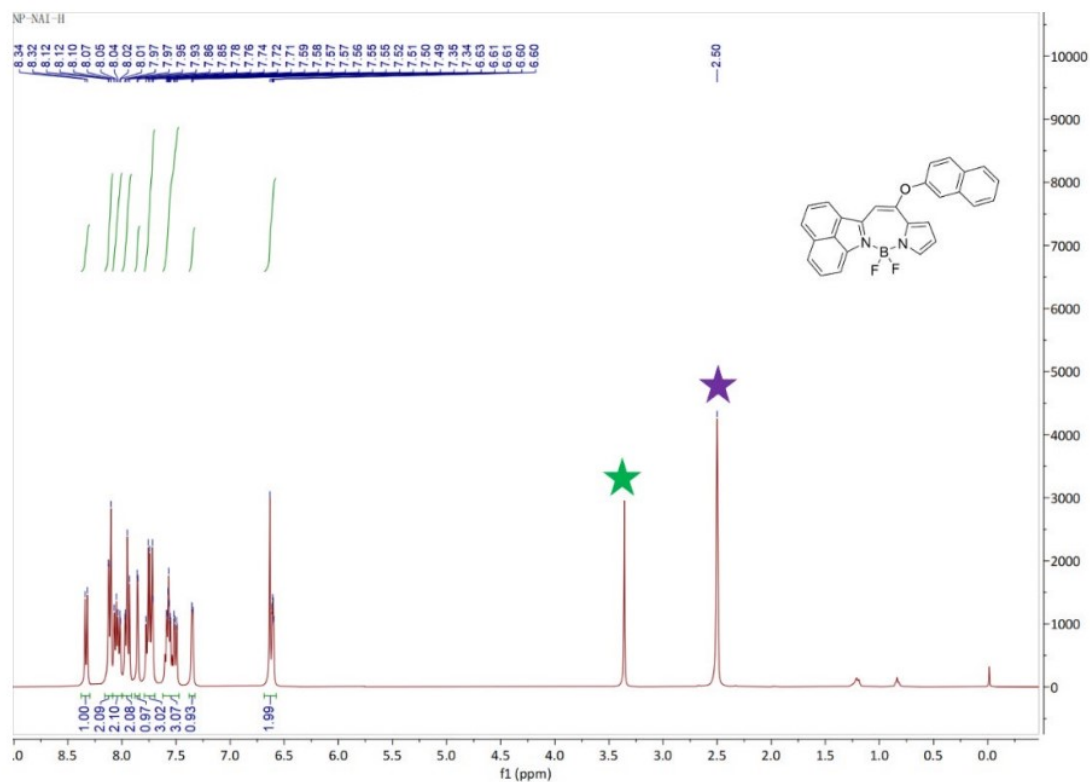

Figure S28  $^1\text{H}$  NMR spectra of **10e** in  $\text{DMSO}-d_6$  (green star denotes the residual peak of  $\text{H}_2\text{O}$ , purple star denotes the solvent residual peak of DMSO at 2.50 ppm as the referenced signal).

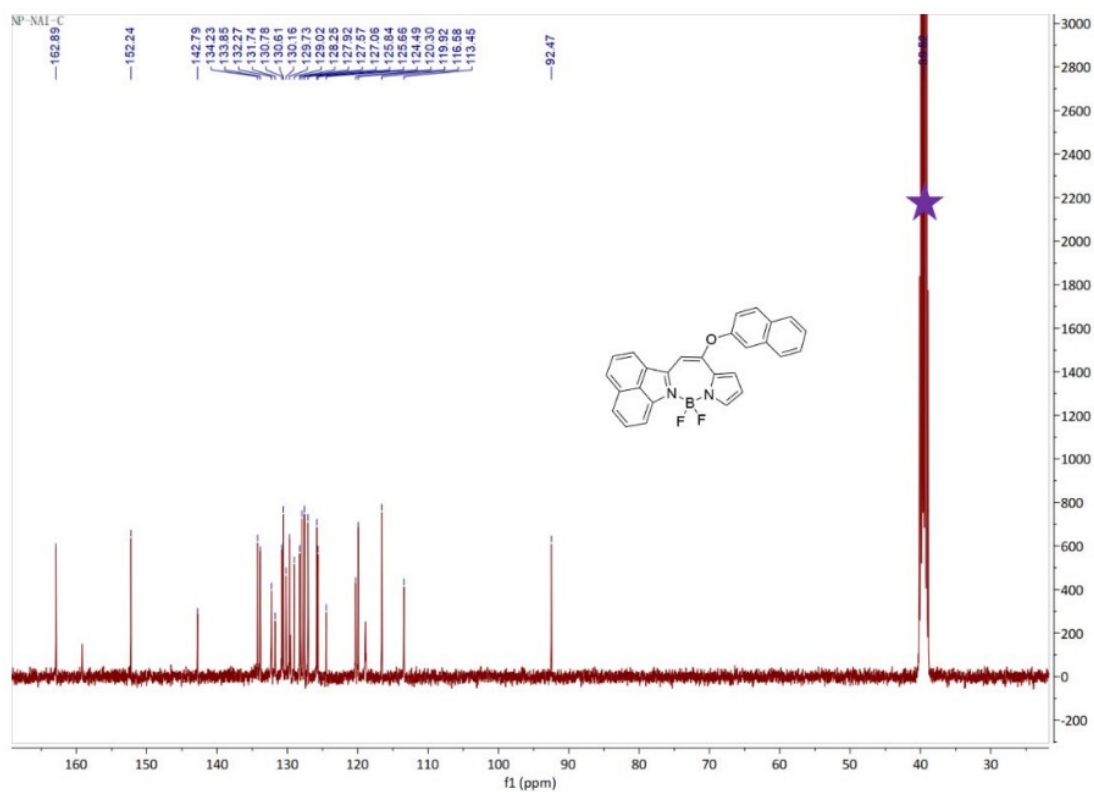

Figure S29 <sup>13</sup>C NMR spectra of **10e** in DMSO-*d*<sub>6</sub> (purple star denotes the solvent residual peak of DMSO at 39.52 ppm as the referenced signal).

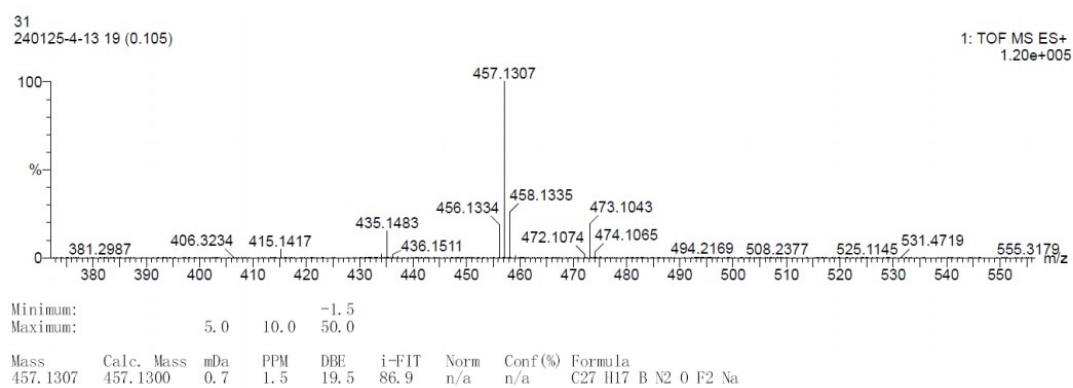

Figure S30 HR-MS spectra of **10e**

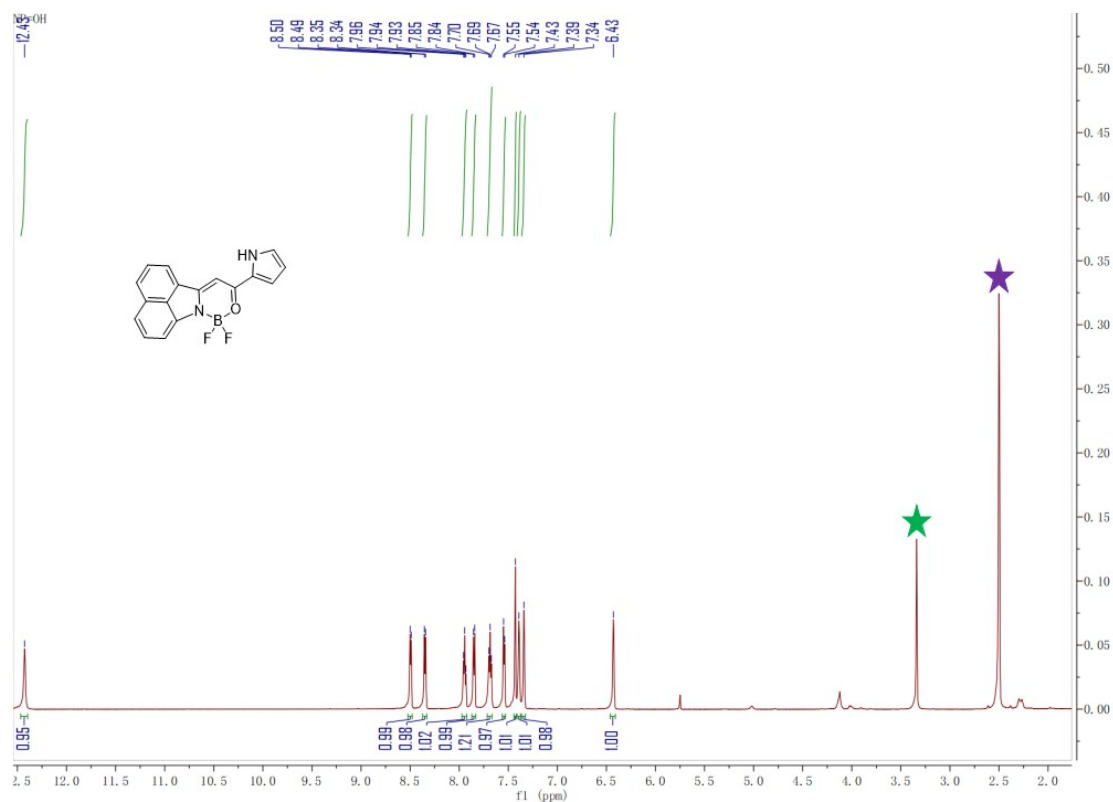

Figure S31 <sup>1</sup>H NMR spectra of **11** in DMSO-d<sub>6</sub> (green star denotes the residual peak of H<sub>2</sub>O, purple star denotes the solvent residual peak of DMSO at 2.50 ppm as the referenced signal)

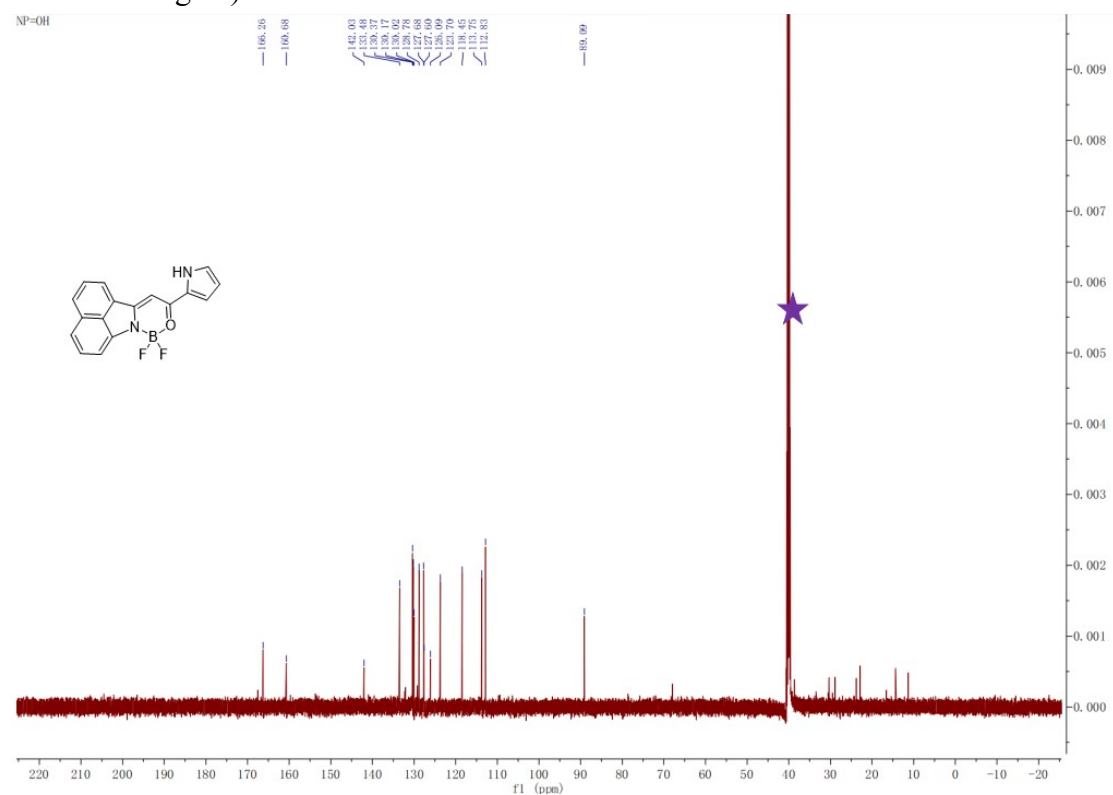

Figure S32 <sup>13</sup>C NMR spectra of **11** in DMSO-d<sub>6</sub> (purple star denotes the solvent residual peak of DMSO at 40.02 ppm as the referenced signal)

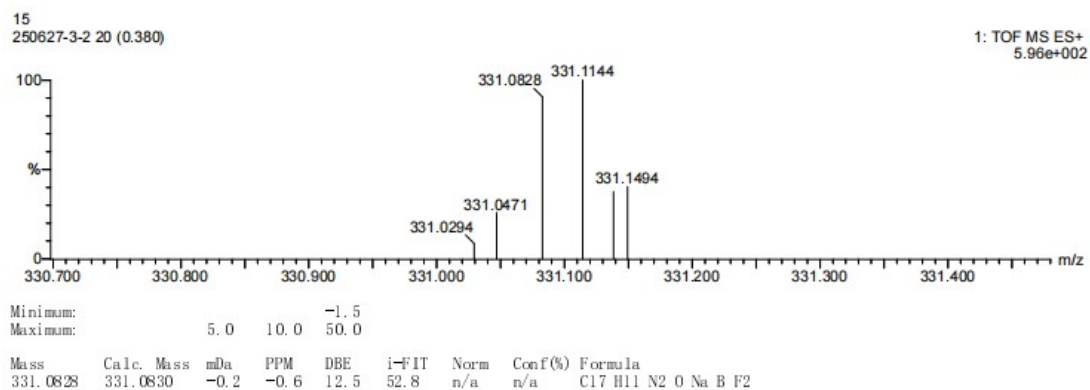

Figure S33 HR-MS spectra of **11**

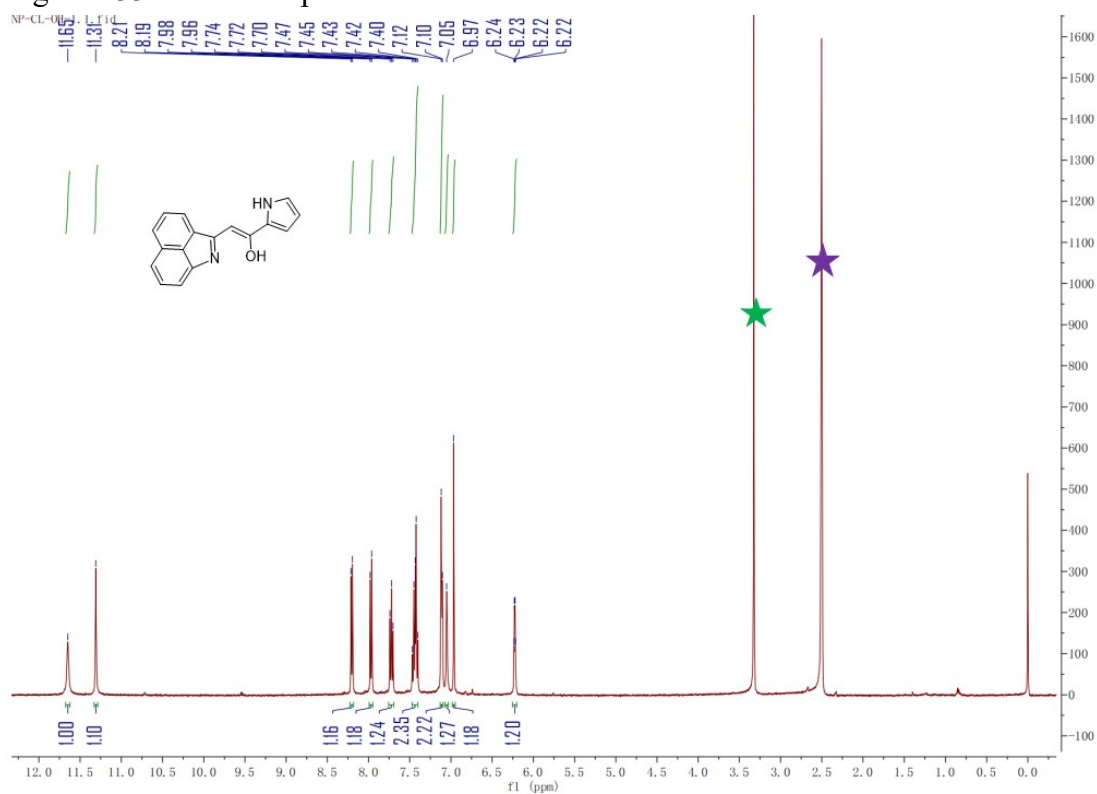

Figure S34  $^1\text{H}$  NMR spectra of **12** in  $\text{DMSO}-d_6$  (green star denotes the residual peak of  $\text{H}_2\text{O}$ , purple star denotes the solvent residual peak of DMSO at 2.50 ppm as the referenced signal).



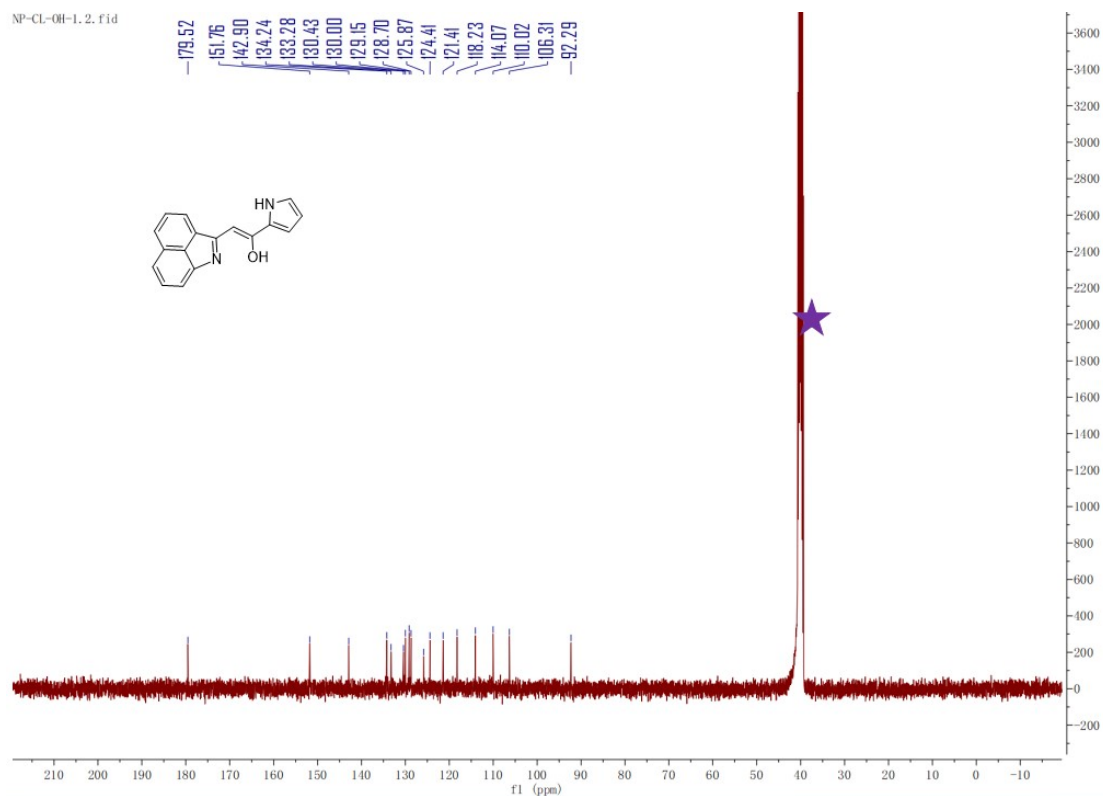

Figure S35 <sup>13</sup>C NMR spectra of **12** in DMSO-d<sub>6</sub> (purple star denotes the solvent residual peak of DMSO at 40.02 ppm as the referenced signal)

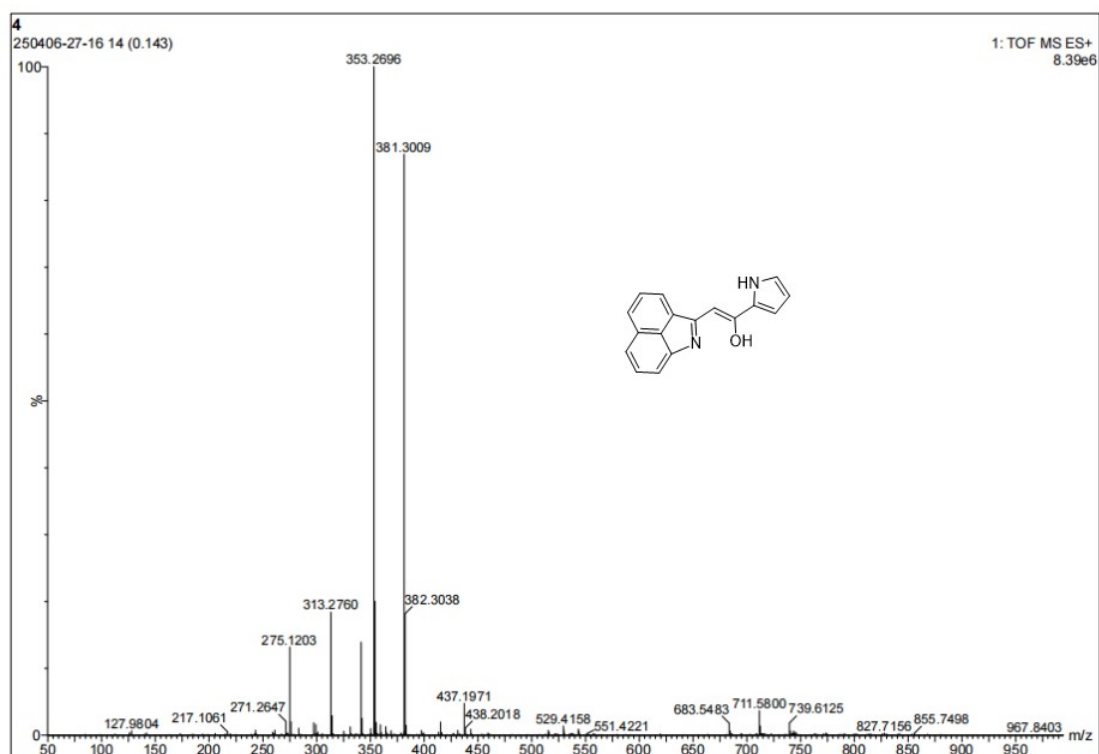

Figure S36 HR-MS spectra of **12**

Table S1 Optimization of the reaction conditions for compound **5**<sup>a</sup>.

| Entry | Solvent     | Catalyst (Loading)         | Loading of <b>1</b> (equiv) | Yield (%) <sup>b</sup> |
|-------|-------------|----------------------------|-----------------------------|------------------------|
| 1     | Toluene     | POCl <sub>3</sub>          | 1.0                         | 12                     |
| 2     | DMSO        | POCl <sub>3</sub>          | 1.0                         | N.R.                   |
| 3     | DMF         | POCl <sub>3</sub>          | 1.0                         | N.R.                   |
| 4     | 1,4-Dioxane | POCl <sub>3</sub>          | 1.0                         | N.R.                   |
| 5     | DCE         | POCl <sub>3</sub>          | 1.0                         | 4                      |
| 6     | Toluene     | TiCl <sub>4</sub>          | 1.0                         | N.R.                   |
| 7     | Toluene     | POCl <sub>3</sub> (2.0 eq) | 1.0                         | 8                      |
| 8     | Toluene     | POCl <sub>3</sub> (3.0 eq) | 1.0                         | 19                     |
| 9     | Toluene     | POCl <sub>3</sub> (4.0 eq) | 1.0                         | 10                     |
| 10    | Toluene     | POCl <sub>3</sub> (3.0 eq) | 1.5                         | 33                     |
| 11    | Toluene     | POCl <sub>3</sub> (3.0 eq) | 2.0                         | 28                     |

<sup>a</sup> Reaction conditions: All reactions were carried out under reflux conditions with stirring for 3 hours.

<sup>b</sup> Isolated yield after purification by column chromatography.

Abbreviations: DMSO, Dimethyl sulfoxide; DMF, N,N-dimethylformamide; DCE, 1,2-Dichloroethane

Table S2 The effect of silica gel on the conversion of **12** to **9**<sup>a</sup>.

| Entry | Silica gel        | Ratio. <sup>b</sup> | Time (h) | Conversion(%) |
|-------|-------------------|---------------------|----------|---------------|
| 1     | Acidic (300–400)  | 0.5                 | 2        | 45            |
| 2     | Acidic (300–400)  | 1.0                 | 2        | 100           |
| 3     | Acidic (300–400)  | 2.0                 | 2        | 100           |
| 4     | Neutral (300–400) | 1.0                 | 2        | 5             |
| 5     | --                | --                  | 24       | trace         |

<sup>a</sup> Reaction conditions: Compound **12** (0.1 mmol) was dissolved in dichloromethane, followed by the addition of silica gel in a certain proportion, and the mixture was stirred at room temperature.

<sup>b</sup> The molar ratio of silica gel to compound **12**.

## 6. UV-Vis and fluorescence data and spectra

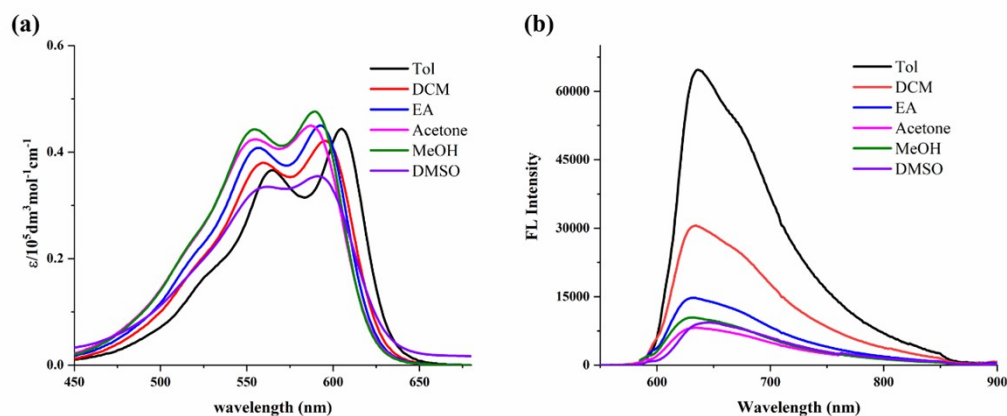

Figure S37 The absorption (a) and emission (b) spectra of **7** in toluene, DCM, EA, Acetone, MeOH, DMSO

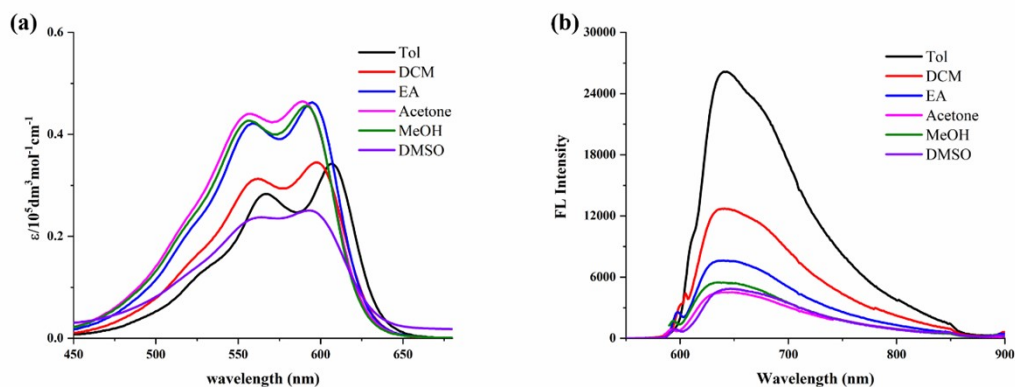

Figure S38 The absorption (a) and emission (b) spectra of **8** in toluene, DCM, EA, Acetone, MeOH, DMSO

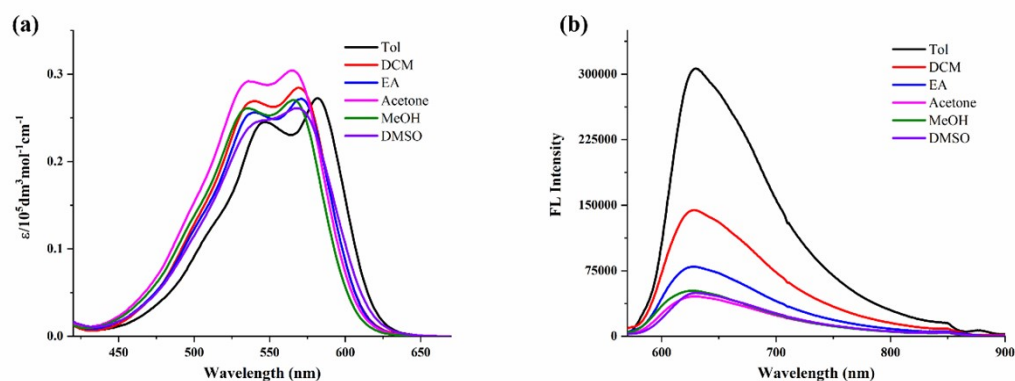

Figure S39 The absorption (a) and emission (b) spectra of **10a** in toluene, DCM, EA, Acetone, MeOH, DMSO

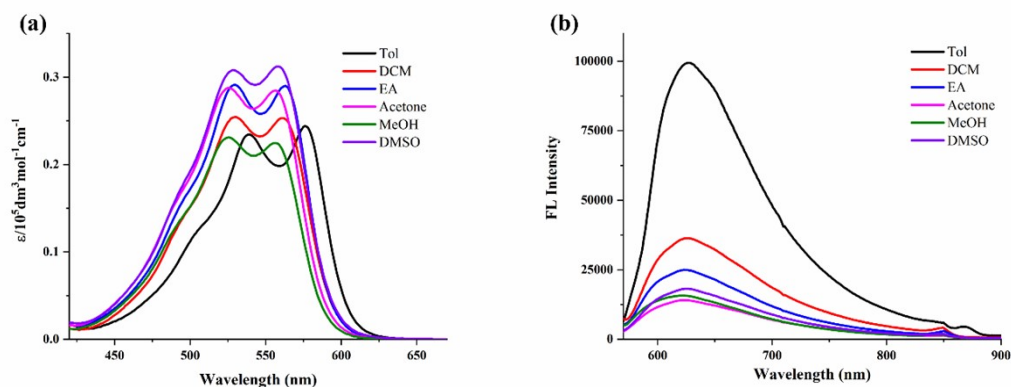

Figure S40 The absorption (a) and emission (b) spectra of **10b** in toluene, DCM, EA, Acetone, MeOH, DMSO

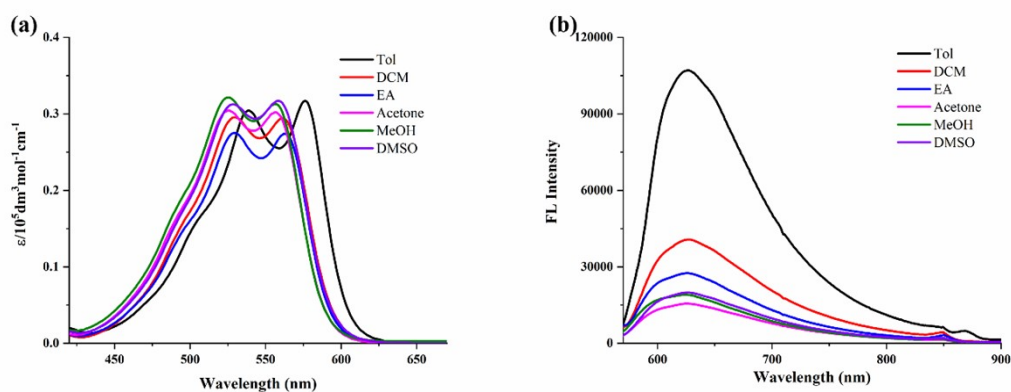

Figure S41 The absorption (a) and emission (b) spectra of **10c** in toluene, DCM, EA, Acetone, MeOH, DMSO

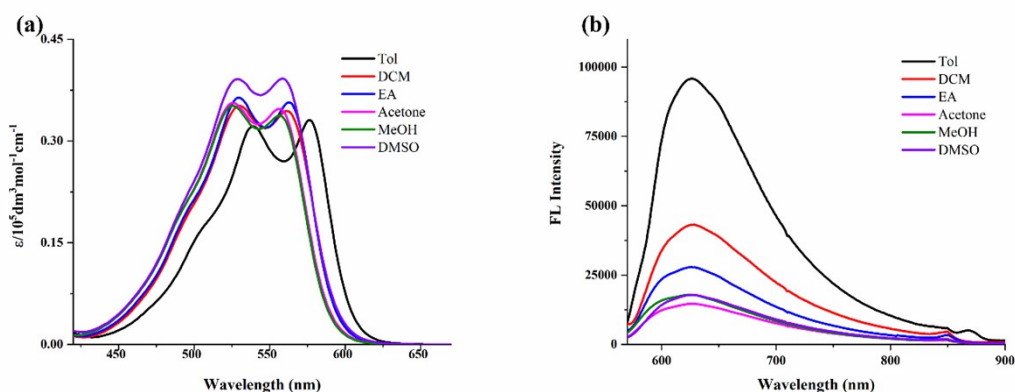

Figure S42 The absorption (a) and emission (b) spectra of **10d** in toluene, DCM, EA, Acetone, MeOH, DMSO

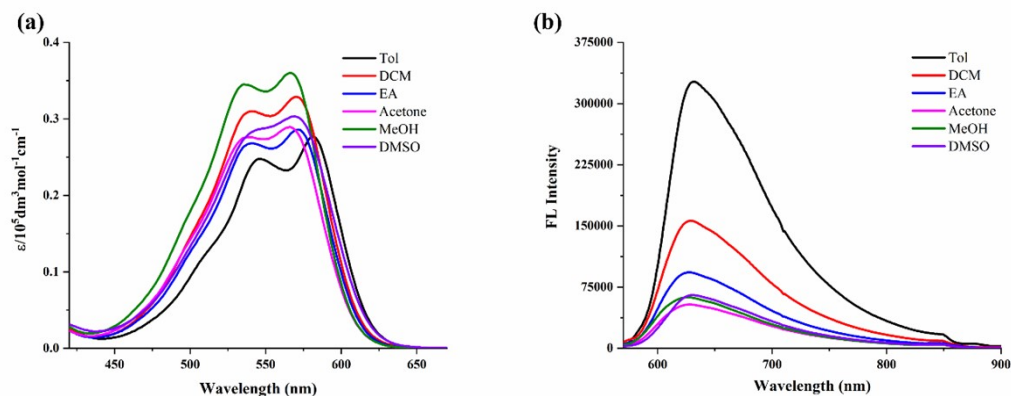

Figure S43 The absorption (a) and emission (b) spectra of **10e** in toluene, DCM, EA, Acetone, MeOH, DMSO

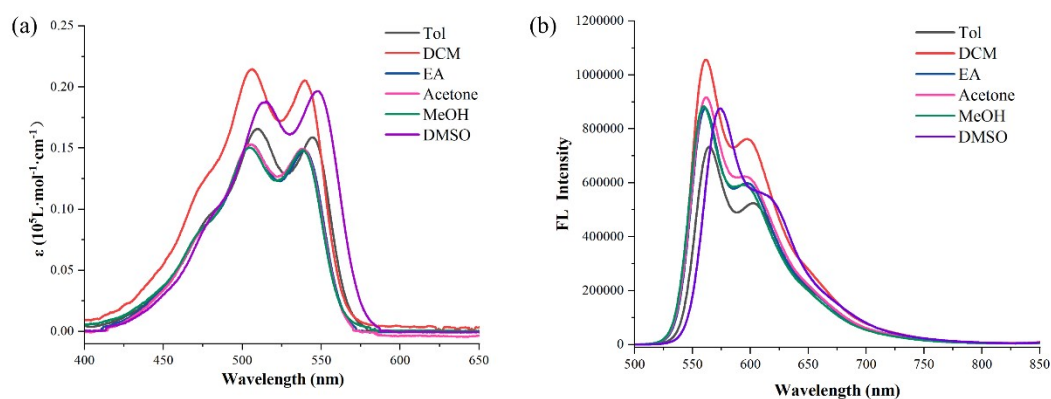

Figure S44 The absorption (a) and emission (b) spectra of **11** in toluene, DCM, EA, Acetone, MeOH, DMSO

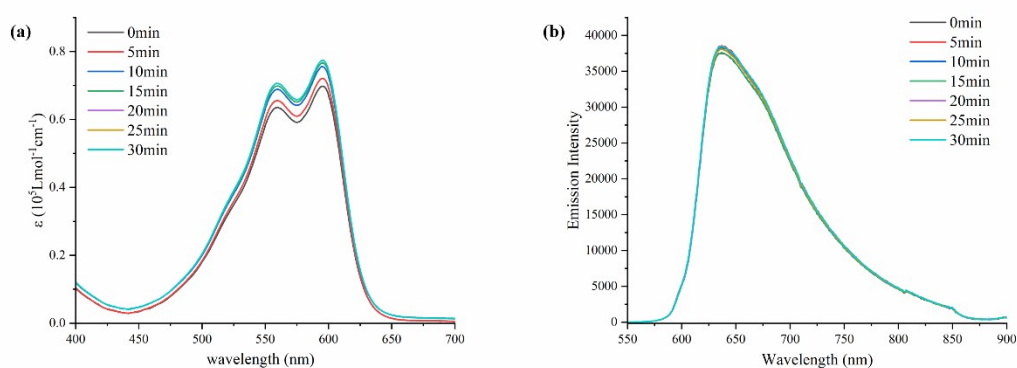

Figure S45 Photostability assessment of compounds **7** under continuous irradiation. (a, b) Evolution of the UV-vis absorption (a) and fluorescence emission (b) spectra of compound **7** under irradiation with a 50 W Xe lamp ( $\lambda = 400\text{--}700 \text{ nm}$ ).

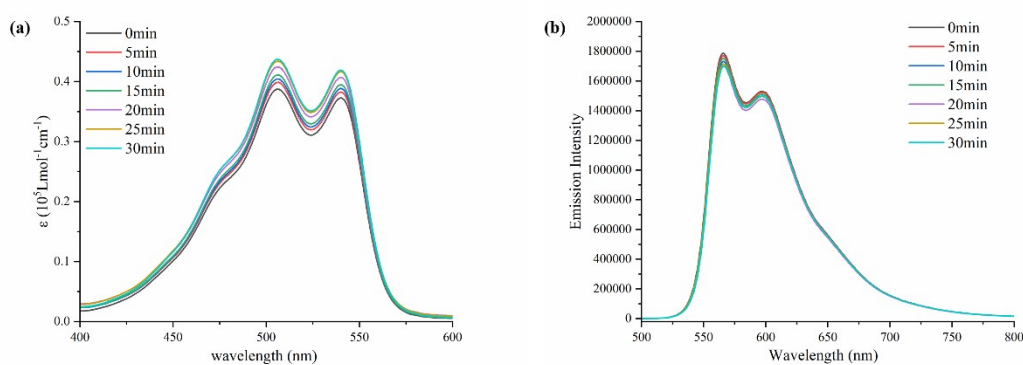

Figure S46 Photostability assessment of compounds **11** under continuous irradiation. (a, b) Evolution of the UV-vis absorption (a) and fluorescence emission (b) spectra of compound **11** under irradiation with a 50 W Xe lamp ( $\lambda = 400\text{--}700$  nm).

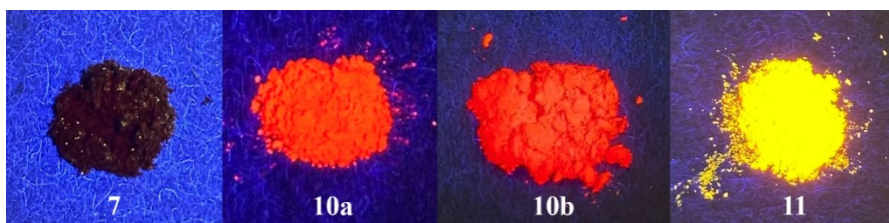

Figure S47 Solid-state fluorescence images for compounds **7**, **10a**, **10b** and **11**.

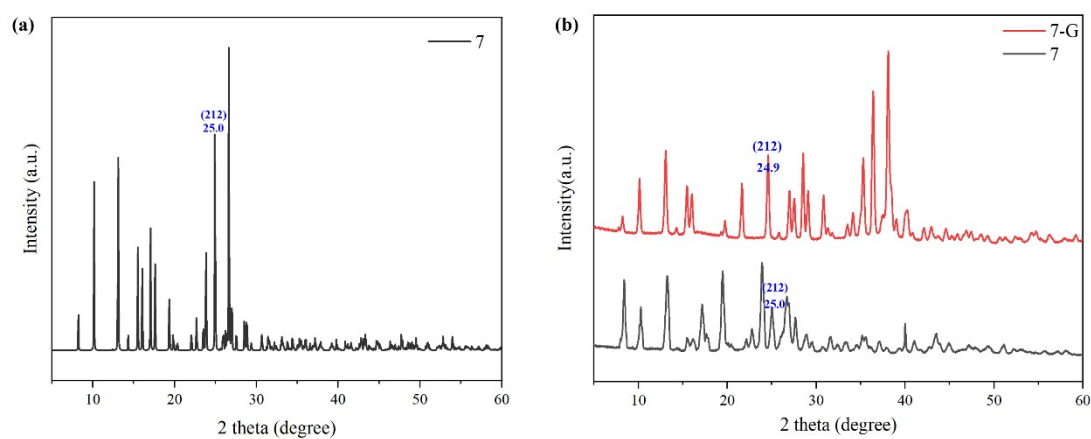

Figure S48 (a) XRD card derived from single-crystal data of **7**. (b) XRD pattern of compound **7** before grinding (**7**, black) and after grinding (**7-G**, red).



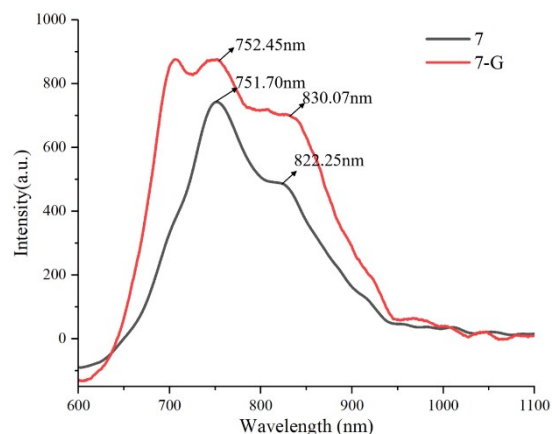

Figure S49 Reflection spectra of powder 7 before grinding (7, black) and after grinding (7-G, red).

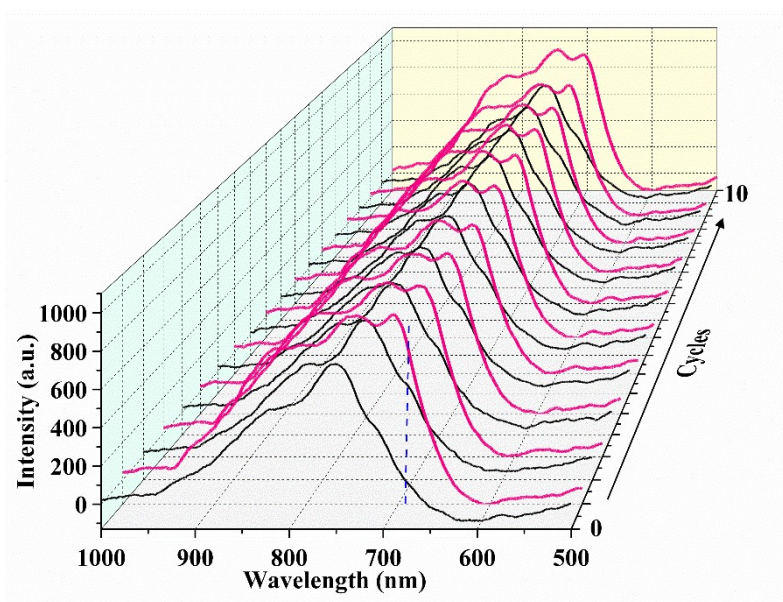

Figure S50 Reflection spectra of powder 7 before (black line) and after grinding (red line), nineteen independent measurements in the initial state, grinding and standing state, respectively. The intensity values at 700.23 nm (marked by the blue line) were extracted to plot the line chart in Figure 1c.

Table S3 Photophysical properties of **BOPYIN**, **BOPYRENPY** in Gonzalez's group, the compound in Gai's group, **7 ~ 8 and 10 ~ 11** in different solvents at room temperature.

| Comp.                         | Solvent | $\lambda_{\text{abs}}$ ( $\epsilon/105 \text{ M} \cdot \text{l cm}^{-1}$ )(nm) | $\lambda_{\text{ex}}$ (excitation wavelength, nm) | $\lambda_{\text{em}}$ in solvents nm) | Stokes shift |                      | $\Phi_f^a$ (%) |
|-------------------------------|---------|--------------------------------------------------------------------------------|---------------------------------------------------|---------------------------------------|--------------|----------------------|----------------|
|                               |         |                                                                                |                                                   |                                       | (nm)         | ( $\text{cm}^{-1}$ ) |                |
| BOPYIN                        | DCM     | 470                                                                            | 525                                               | -                                     | 55           | 2228                 | 33             |
| BOPYRENPY in Gonzalez's group | DCM     | 475                                                                            | 516                                               | -                                     | 41           | 1673                 | 4              |
| The compound in Gai's group   | DCM     | 458                                                                            | 514                                               | -                                     | 56           | 2379                 | -              |
| 7                             | Toluene | 605(0.44)<br>565(0.37)                                                         | 605                                               | 636                                   | 31           | 806                  | 5              |
|                               | DCM     | 595(0.42)<br>560(0.38)                                                         | 596                                               | 634                                   | 38           | 1033                 | 2              |
|                               | EA      | 593(0.45)<br>558(0.41)                                                         | 593                                               | 632                                   | 39           | 1041                 | 1              |
|                               | Acetone | 587(0.45)<br>556(0.42)                                                         | 587                                               | 634                                   | 47           | 1263                 | <1             |
|                               | MeOH    | 589(0.48)<br>555(0.44)                                                         | 589                                               | 632                                   | 43           | 1155                 | <1             |
|                               | DMSO    | 591(0.36)<br>562(0.34)                                                         | 591                                               | 644                                   | 53           | 1392                 | <1             |
| 8                             | Toluene | 607(0.34)<br>567(0.28)                                                         | 607                                               | 640                                   | 33           | 849                  | 2              |
|                               | DCM     | 598(0.34)<br>562(0.31)                                                         | 598                                               | 641                                   | 43           | 1122                 | 1              |
|                               | EA      | 595(0.46)<br>559(0.42)                                                         | 595                                               | 636                                   | 41           | 1083                 | <1             |
|                               | Acetone | 589(0.47)<br>557(0.44)                                                         | 589                                               | 639                                   | 50           | 1328                 | <1             |
|                               | MeOH    | 591(0.46)<br>557(0.43)                                                         | 591                                               | 636                                   | 45           | 1197                 | <1             |
|                               | DMSO    | 593(0.25)<br>564(0.24)                                                         | 593                                               | 646                                   | 53           | 1383                 | <1             |
|                               | Toluene | 582(0.28)                                                                      | 582                                               | 630                                   | 48           | 1300                 | 5              |



|     |         |                        |     |     |    |      |    |
|-----|---------|------------------------|-----|-----|----|------|----|
|     |         | 547(0.25)              |     |     |    |      |    |
|     | DCM     | 569(0.29)<br>541(0.27) | 569 | 628 | 59 | 1651 | 2  |
|     | EA      | 571(0.27)<br>540(0.26) | 571 | 629 | 58 | 1615 | 1  |
|     | Acetone | 565(0.31)<br>536(0.29) | 565 | 628 | 63 | 1776 | <1 |
|     | MeOH    | 566(0.27)<br>535(0.26) | 566 | 627 | 61 | 1719 | <1 |
|     | DMSO    | 568(0.26)              | 568 | 630 | 62 | 1733 | <1 |
| 10b | Toluene | 576(0.25)<br>539(0.24) | 576 | 627 | 51 | 1412 | 1  |
|     | DCM     | 561(0.25)<br>530(0.25) | 561 | 627 | 66 | 1876 | <1 |
|     | EA      | 563(0.29)<br>530(0.29) | 563 | 623 | 60 | 1774 | <1 |
|     | Acetone | 556(0.28)<br>526(0.28) | 556 | 623 | 67 | 1934 | <1 |
|     | MeOH    | 556(0.22)<br>526(0.23) | 556 | 623 | 67 | 1934 | <1 |
|     | DMSO    | 558(0.31)<br>529(0.31) | 558 | 626 | 68 | 1947 | <1 |
| 10c | Toluene | 576(0.32)<br>539(0.31) | 576 | 627 | 51 | 1412 | 2  |
|     | DCM     | 561(0.28)<br>530(0.28) | 561 | 626 | 65 | 1851 | <1 |
|     | EA      | 563(0.27)<br>530(0.27) | 563 | 626 | 63 | 1788 | <1 |
|     | Acetone | 556(0.35)<br>526(0.36) | 556 | 626 | 70 | 2011 | <1 |
|     | MeOH    | 556(0.31)<br>526(0.32) | 556 | 624 | 68 | 1960 | <1 |
|     | DMSO    | 558(0.32)<br>529(0.32) | 558 | 626 | 68 | 1947 | <1 |
| 10d | Toluene | 576(0.33)<br>539(0.32) | 576 | 627 | 51 | 1412 | 2  |
|     | DCM     | 561(0.35)<br>530(0.35) | 561 | 629 | 68 | 1927 | <1 |
|     | EA      | 563(0.36)<br>530(0.36) | 563 | 626 | 63 | 1788 | <1 |
|     | Acetone | 556(0.35)<br>526(0.36) | 556 | 626 | 70 | 2011 | <1 |
|     | MeOH    | 556(0.33)              | 556 | 625 | 69 | 1986 | <1 |

|     |         |                        |     |            |    |      |    |
|-----|---------|------------------------|-----|------------|----|------|----|
|     |         | 526(0.35)              |     |            |    |      |    |
|     | DMSO    | 558(0.39)<br>529(0.39) | 558 | 627        | 69 | 1972 | <1 |
| 10e | Toluene | 581(0.27)<br>546(0.25) | 581 | 632        | 51 | 1389 | 4  |
|     | DCM     | 570(0.33)<br>541(0.31) | 570 | 629        | 59 | 1646 | 2  |
|     | EA      | 571(0.28)<br>540(0.27) | 571 | 628        | 57 | 1590 | 1  |
|     | Acetone | 566(0.29)<br>539(0.27) | 566 | 629        | 63 | 1770 | <1 |
|     | MeOH    | 566(0.36)<br>535 0.35) | 566 | 626        | 60 | 1693 | <1 |
|     | DMSO    | 569(0.30)              | 569 | 631        | 62 | 1727 | <1 |
| 11  | Toluene | 544(0.16)<br>509(0.17) | 544 | 603<br>565 | 59 | 1799 | 88 |
|     | DCM     | 539(0.21)<br>506(0.22) | 539 | 597<br>562 | 58 | 1803 | 86 |
|     | EA      | 539(0.15)<br>506(0.15) | 539 | 597<br>561 | 58 | 1803 | 68 |
|     | Acetone | 537(0.15)<br>505(0.15) | 537 | 562        | 25 | 828  | 67 |
|     | MeOH    | 538(0.15)<br>504(0.15) | 538 | 594<br>560 | 56 | 1752 | 56 |
|     | DMSO    | 547(0.20)<br>515(0.19) | 547 | 574        | 27 | 860  | 99 |

## 7. Single Crystal

Table S4 Crystal data for **7**, **9**, **10a**, and **11**

| Identification code | 7                                                                    | 9                                                | 10a                                                                 | 11                                                                  |
|---------------------|----------------------------------------------------------------------|--------------------------------------------------|---------------------------------------------------------------------|---------------------------------------------------------------------|
| Empirical formula   | C <sub>17</sub> H <sub>10</sub> BF <sub>2</sub> N <sub>2</sub><br>Cl | C <sub>17</sub> H <sub>12</sub> N <sub>2</sub> O | C <sub>23</sub> H <sub>15</sub> BN <sub>2</sub> O<br>F <sub>2</sub> | C <sub>17</sub> H <sub>11</sub> BF <sub>2</sub> N <sub>2</sub><br>O |
| Formula weight      | 349.14                                                               | 260.29                                           | 407.11                                                              | 308.09                                                              |
| Temperature/K       | 297.7(2)                                                             | 100.01(11)                                       | 99.99(10)                                                           | 170.00(10)                                                          |
| Crystal system      | monoclinic                                                           | orthorhombic                                     | triclinic                                                           | monoclinic                                                          |
| Space group         | P2 <sub>1</sub> /c                                                   | Pbca                                             | P-1                                                                 | P2 <sub>1</sub> /c                                                  |
| a/Å                 | 8.72703(19)                                                          | 5.1777(2)                                        | 10.1116(2)                                                          | 9.6144(2)                                                           |
| b/Å                 | 7.57330(14)                                                          | 19.0358(12)                                      | 11.6324(2)                                                          | 8.74800(10)                                                         |
| c/Å                 | 21.4926(4)                                                           | 24.8301(14)                                      | 30.3083(5)                                                          | 16.3991(3)                                                          |
| α/°                 | 90                                                                   | 90                                               | 94.5670(10)                                                         | 90                                                                  |
| β/°                 | 90.3969(19)                                                          | 90                                               | 97.121(2)                                                           | 105.208(2)                                                          |

|                                                  |                                                                  |                                                                  |                                                                    |                                                                   |
|--------------------------------------------------|------------------------------------------------------------------|------------------------------------------------------------------|--------------------------------------------------------------------|-------------------------------------------------------------------|
| $\gamma/^{\circ}$                                | 90                                                               | 90                                                               | 90.226(2)                                                          | 90                                                                |
| Volume/ $\text{\AA}^3$                           | 1420.46(5)                                                       | 2447.3(2)                                                        | 3525.85(11)                                                        | 1330.97(4)                                                        |
| Z                                                | 4                                                                | 8                                                                | 8                                                                  | 4                                                                 |
| $\rho_{\text{calc}}/\text{g/cm}^3$               | 1.527                                                            | 1.413                                                            | 1.447                                                              | 1.537                                                             |
| $\mu/\text{mm}^{-1}$                             | 2.579                                                            | 0.715                                                            | 0.854                                                              | 0.969                                                             |
| F(000)                                           | 664                                                              | 1088                                                             | 1584                                                               | 632                                                               |
| Crystal size/ $\text{mm}^3$                      | $0.14 \times 0.12 \times 0.11$                                   | $0.13 \times 0.11 \times 0.09$                                   | $0.15 \times 0.12 \times 0.1$                                      | $0.14 \times 0.13 \times 0.12$                                    |
| Radiation                                        | Cu $K_{\alpha}$ ( $\lambda = 1.54184$ )                          | Cu $K_{\alpha}$ ( $\lambda = 1.54184$ )                          | Cu $K_{\alpha}$ ( $\lambda = 1.54184$ )                            | Cu $K_{\alpha}$ ( $\lambda = 1.54184$ )                           |
| 2 $\theta$ range for data collection/ $^{\circ}$ | 8.22 to 133.2                                                    | 9.292 to 145.738                                                 | 5.9 to 146.82                                                      | 9.532 to 145.642                                                  |
| Index ranges                                     | $-10 \leq h \leq 10$ , $-9 \leq k \leq 4$ , $-25 \leq l \leq 25$ | $-4 \leq h \leq 6$ , $-23 \leq k \leq 22$ , $-29 \leq l \leq 30$ | $-12 \leq h \leq 12$ , $-10 \leq k \leq 14$ , $-37 \leq l \leq 37$ | $-11 \leq h \leq 11$ , $-10 \leq k \leq 8$ , $-18 \leq l \leq 20$ |
| Reflections collected                            | 6237                                                             | 16744                                                            | 48774                                                              | 8972                                                              |
| Independent reflections                          | 2495 [ $R_{\text{int}} = 0.0233$ , $R_{\text{sigma}} = 0.0230$ ] | 2344 [ $R_{\text{int}} = 0.1212$ , $R_{\text{sigma}} = 0.0541$ ] | 13651 [ $R_{\text{int}} = 0.0657$ , $R_{\text{sigma}} = 0.0576$ ]  | 2572 [ $R_{\text{int}} = 0.0168$ , $R_{\text{sigma}} = 0.0156$ ]  |
| Data/restraints/parameters                       | 2495/0/209                                                       | 2344/0/181                                                       | 13651/0/1045                                                       | 2572/0/209                                                        |
| Goodness-of-fit on $F^2$                         | 1.081                                                            | 1.319                                                            | 1.15                                                               | 1.037                                                             |
| Final R indexes [ $I \geq 2\sigma(I)$ ]          | $R_1 = 0.0345$ , $wR_2 = 0.0945$                                 | $R_1 = 0.1024$ , $wR_2 = 0.2277$                                 | $R_1 = 0.0797$ , $wR_2 = 0.2608$                                   | $R_1 = 0.0309$ , $wR_2 = 0.0815$                                  |
| Final R indexes [all data]                       | $R_1 = 0.0368$ , $wR_2 = 0.0961$                                 | $R_1 = 0.1114$ , $wR_2 = 0.2328$                                 | $R_1 = 0.0917$ , $wR_2 = 0.2691$                                   | $R_1 = 0.0334$ , $wR_2 = 0.0834$                                  |
| Largest diff. peak/hole / $e \text{\AA}^{-3}$    | 0.23/-0.19                                                       | 0.33/-0.28                                                       | 0.50/-0.51                                                         | 0.25/-0.16                                                        |
| CCDC                                             | 2498678                                                          | 2498676                                                          | 2498680                                                            | 2498677                                                           |

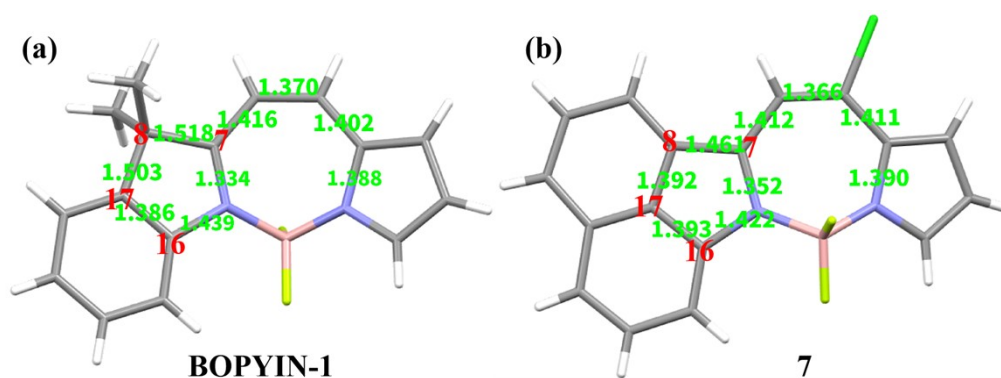

Figure S51 The typical bond lengths of **BOPYIN-1**<sup>2</sup> and compound **7**

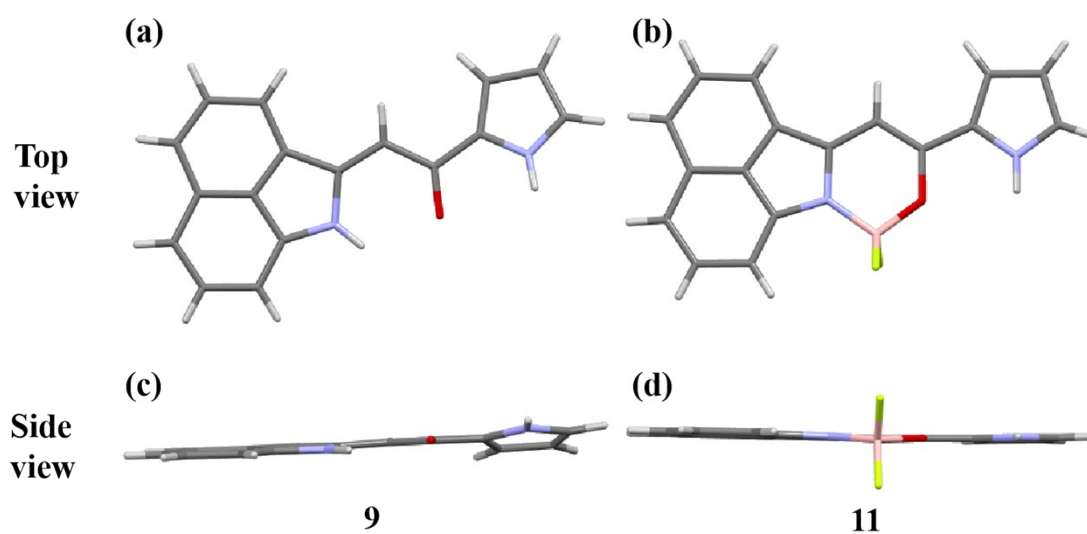

Figure S52 Single-crystal structures of **9** and **11** (yellow for the F atom, purple for the N atom, gray for the C atom, pink for the B atom, red for O atom, while for H atom).

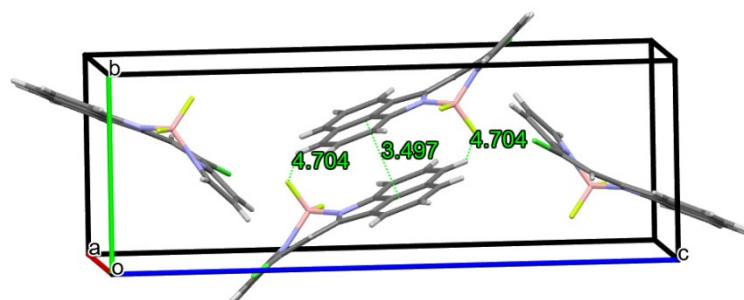

Figure S53 The packing structure of compound **7**

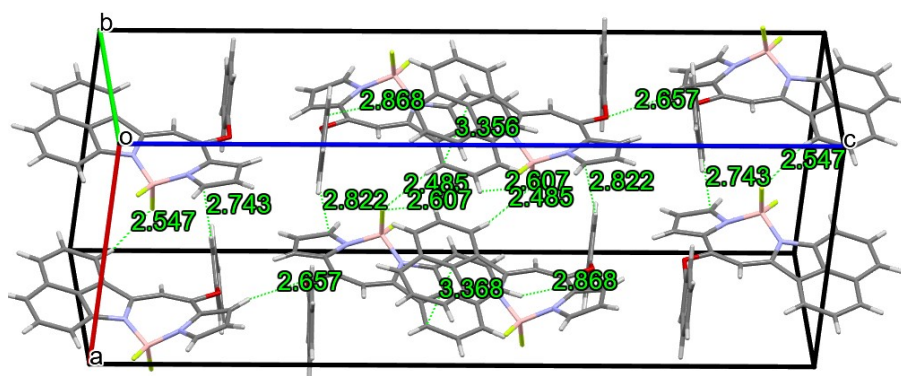

Figure S54 The packing structure of compound **10a**

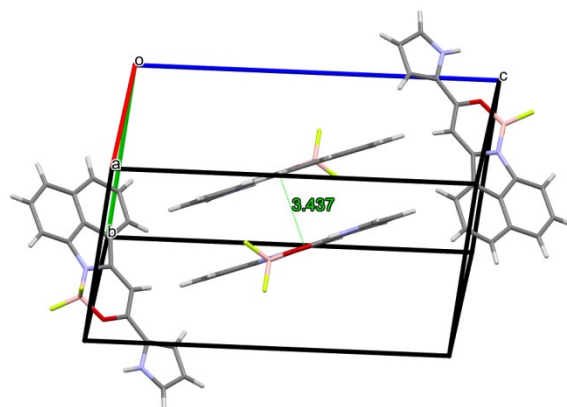

Figure S55 The packing structure of compound **11**

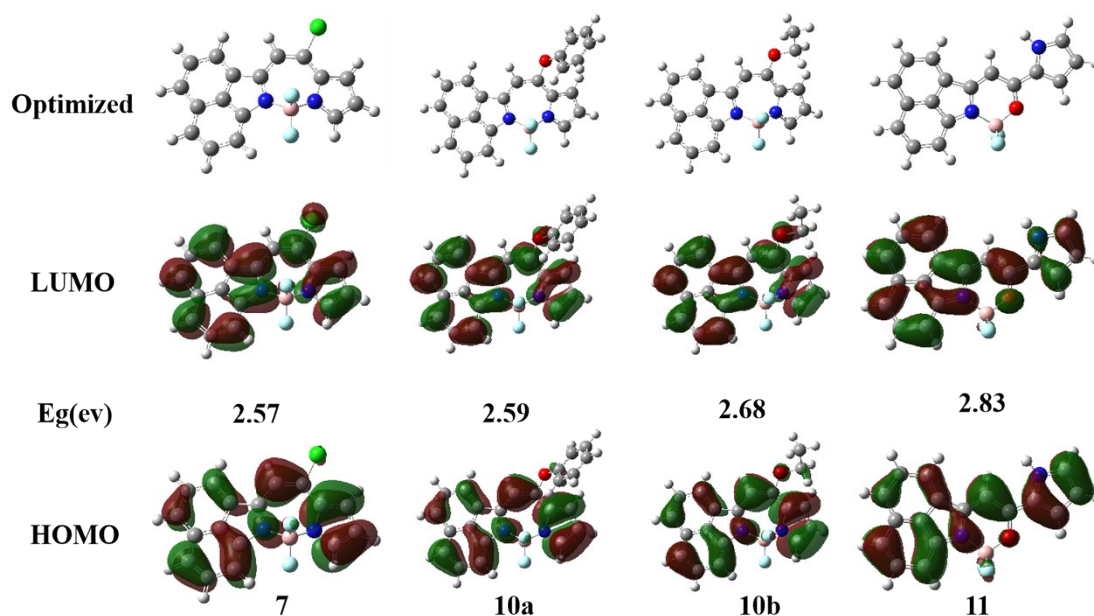

Figure S56 Visualization of HOMO (H) and LUMO (L) with associated energy gaps (Eg/eV) for compounds **7**, **10a**, **10b** and **11**. (B3LYP/6-311G(d,p) level )

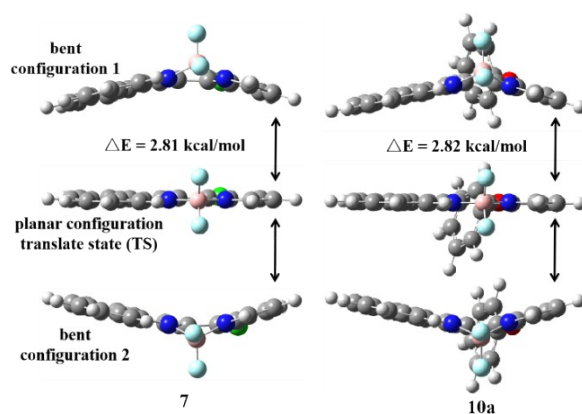

Figure S57 The bent, planar configurations (TS) and activity energies ( $\Delta E$ ) of compound **7** and **10a**.

Table S5 Selected energies in  $S_1$ ,  $T_n$  and the energy gaps for compounds **7** and **10a**

| compound | State | Energy (eV) | $S_1-T_2$ (eV) |
|----------|-------|-------------|----------------|
| 7        | $T_1$ | 1.2465      | 0.0636         |
|          | $T_2$ | 2.4216      |                |
|          | $S_1$ | 2.4852      |                |
| 10a      | $T_1$ | 1.4984      | 0.0662         |
|          | $T_2$ | 2.5648      |                |
|          | $S_1$ | 2.6310      |                |

## References

1. M. J. Frisch, G. W. Trucks, H. B. Schlegel, G. E. Scuseria, M. A. Robb, J. R. Cheeseman, G. Scalmani, V. Barone, G. A. Petersson, H. Nakatsuji, X. Li, M. Caricato, A. V. Marenich, J. Bloino, B. G. Janesko, R. Gomperts, B. Mennucci, H. P. Hratchian, J. V. Ortiz, A. F. Izmaylov, J. L. Sonnenberg, Williams, F. Ding, F. Lipparini, F. Egidi, J. Goings, B. Peng, A. Petrone, T. Henderson, D. Ranasinghe, V. G. Zakrzewski, J. Gao, N. Rega, G. Zheng, W. Liang, M. Hada, M. Ehara, K. Toyota, R. Fukuda, J. Hasegawa, M. Ishida, T. Nakajima, Y. Honda, O. Kitao, H. Nakai, T. Vreven, K. Throssell, Jr. J. A. Montgomery, J. E. Peralta, F. Ogliaro, M. J. Bearpark, J. J. Heyd, E. N. Brothers, K. N. Kudin, V. N. Staroverov, T. A. Keith, R. Kobayashi, J. Normand, K. Raghavachari, A. P. Rendell, J. C. Burant, S. S. Iyengar, J. Tomasi, M. Cossi, J. M. Millam, M. Klene, C. Adamo, R. Cammi, J. W. Ochterski, R. L. Martin, K. Morokuma, O. Farkas, J. B. Foresman, D. J. Fox, Gaussian 16, Revision C. 01, Gaussian, Inc., Wallingford CT, 2016.
